# Supplementary material for: The strong interaction of actinyl ions with fullerenol driven by multiple hydrogen bonds
Source: Royal Society of Chemistry journal article supplement (doi:10.1039/d1dt03996b), 2022-01-01
Supplement: d1dt03996b1.pdf [file d1dt03996b1.pdf]

## Supplementary materials

# The strong interaction of actinyl ions and fulleranol driven by the hydrogen bonds

Jiguang Du<sup>1</sup>□, Gang Jiang<sup>1</sup>

<sup>1</sup> *Institute of Atomic and Molecular Physics, Sichuan University, Chengdu 610065,  
China*

### Contents:

|                                                                                                                                                                             |     |
|-----------------------------------------------------------------------------------------------------------------------------------------------------------------------------|-----|
| <b>Figure S1.</b> The most stable structures and key geometry parameters of bare fulleranol, C <sub>60</sub> (OH) <sub>24</sub> .....                                       | S2  |
| <b>Figure S2.</b> The most stable structures and key geometry parameters of bare actinyl complexes.....                                                                     | S2  |
| <b>Figure S3.</b> Simulated IR spectra of C <sub>60</sub> (OH) <sub>24</sub> fulleranol.....                                                                                | S3  |
| <b>Figure S4.</b> Simulated IR spectra of isolated actinyl complexes.....                                                                                                   | S4  |
| <b>Figure S5.</b> Simulated IR spectra and structure of a typical isomer (egg-like shape) of C <sub>60</sub> (OH) <sub>24</sub> fulleranol .....                            | S5  |
| <b>Figure S6.</b> Structures (a) and IR spectra (b) of a typical isomer (egg-like shape) of C <sub>60</sub> (OH) <sub>24</sub> fulleranol with actinyl ions adsorption..... | S5  |
| <b>Table S1.</b> Cartesian coordinates of all relaxed complexes for actinyl/C <sub>60</sub> (OH) <sub>24</sub> complexes.....                                               | S6  |
| <b>Table S2.</b> Calculated formation energies in the gaseous and aqueous phases at PBE-D3BJ level of theory.....                                                           | S49 |
| <b>Table S3.</b> Calculated formation energies in the gaseous and aqueous phases at wB97X-D3BJ level of theory.....                                                         | S49 |
| <b>Table S4.</b> Topological parameters relevant to the typical chemical bonds in actinyl/C <sub>60</sub> (OH) <sub>24</sub> complexes.....                                 | S50 |
| <b>Table S5.</b> The intrinsic bond strength indexes of typical chemical bonds.....                                                                                         | S50 |
| <b>Table S6.</b> Symmetrical ( $w_{\text{sym}}$ ) and asymmetrical ( $w_{\text{an-sym}}$ ) harmonic vibrational frequencies of O=An=O bonds in studied complexes.....       | S54 |

---

□Corresponding author:  
E-mail: dujg@scu.edu.cn (Jiguang Du)

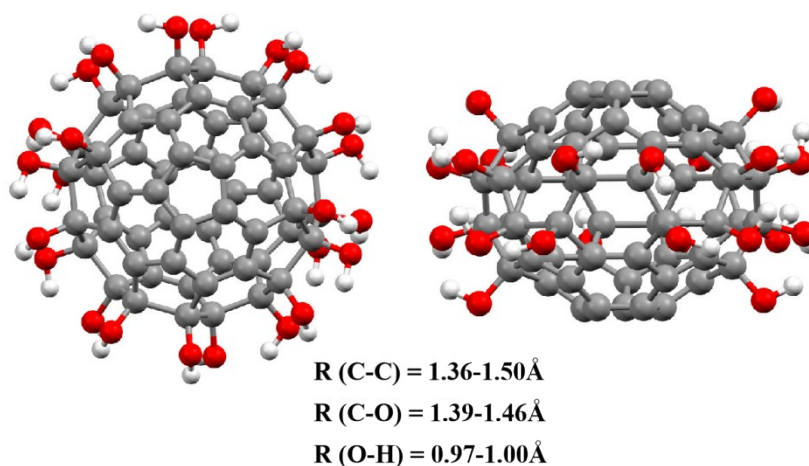

**Figure S1.** Relaxed structures of the most stable  $\text{C}_{60}(\text{OH})_{24}$  with 24 OH groups around the equator of  $\text{C}_{60}$  cage (Saturn-like shape), and key structural parameters including C-C, C-O, and O-H bond lengths were also collected.

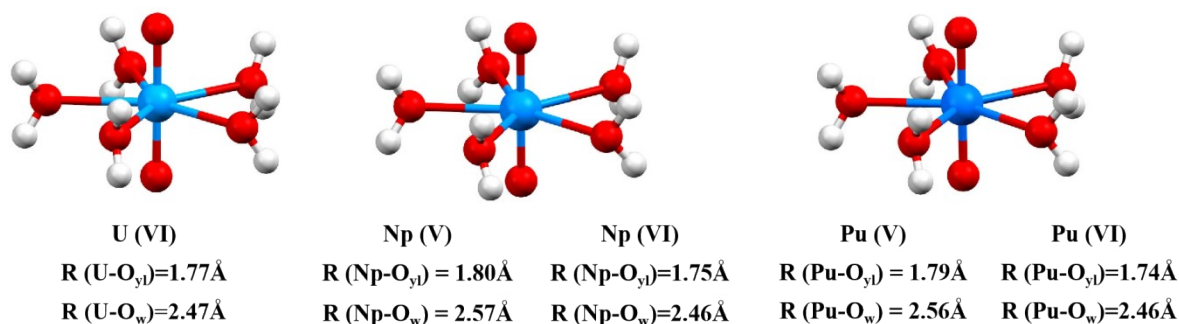

**Figure S2.** Relaxed structures of isolated actinyl complexes, U (V), U (VI), Np (V), Np (VI), Pu (V), and Pu (VI), and An- $\text{O}_{yl}$  and An- $\text{O}_w$  bond lengths in these complexes.

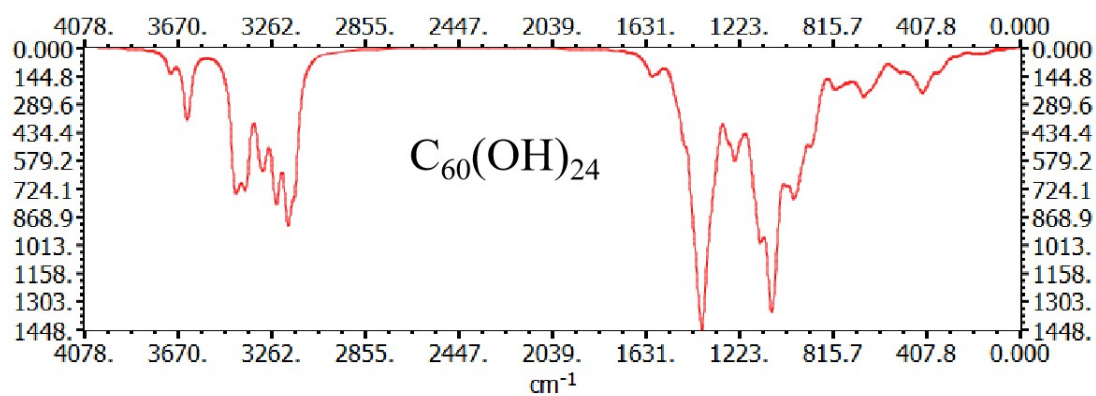

**Figure S3.** Simulated IR spectra for the most stable Saturn like isomer of  $C_{60}(OH)_{24}$  fulleranol.

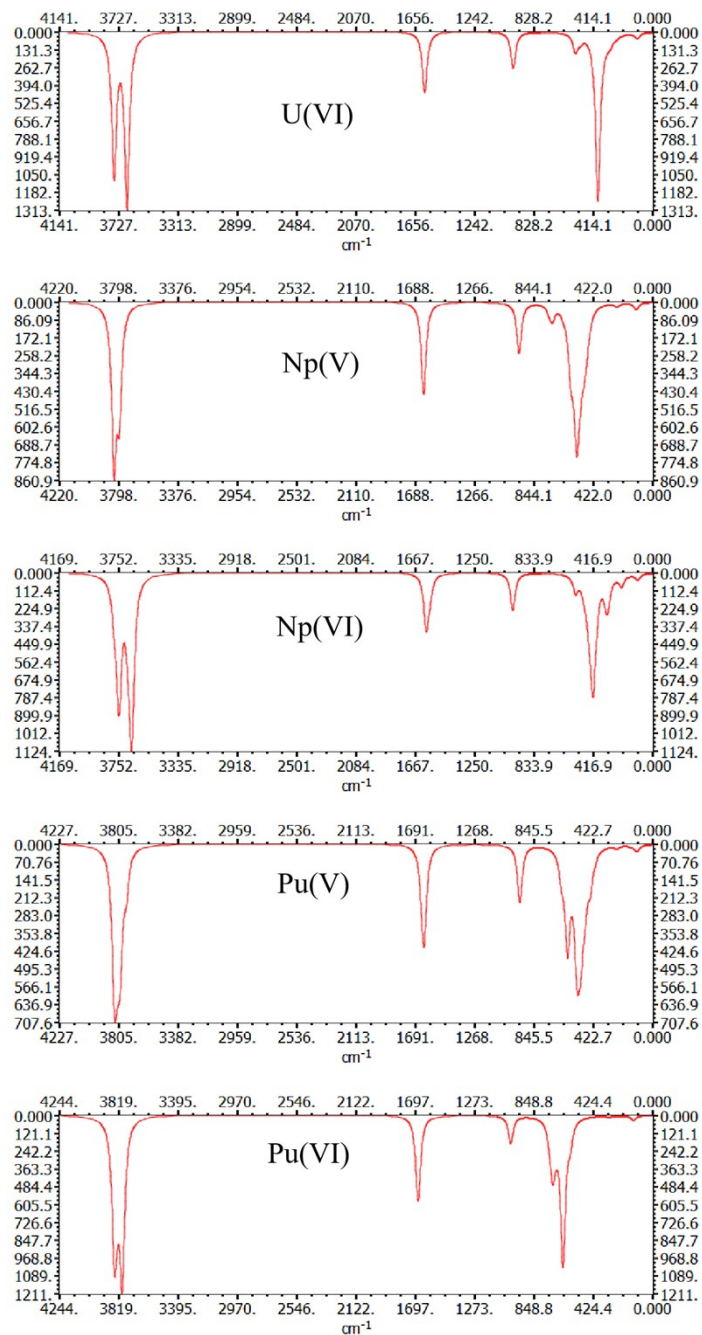

**Figure S4.** Simulated IR spectra of isolated actinyl complexes.

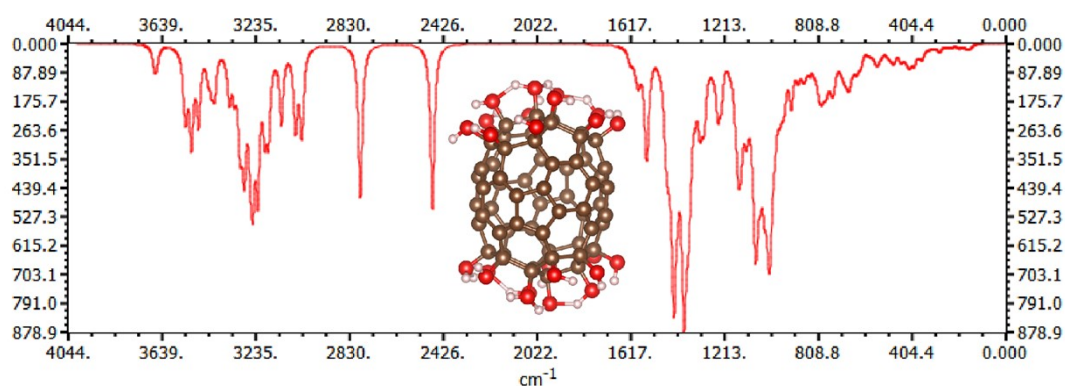

**Figure S5.** Simulated IR spectra and structure of a typical isomer (egg-like shape) of  $C_{60}(OH)_{24}$  fullerene (24 OH groups attached at opposite sides of  $C_{60}$  sphere).

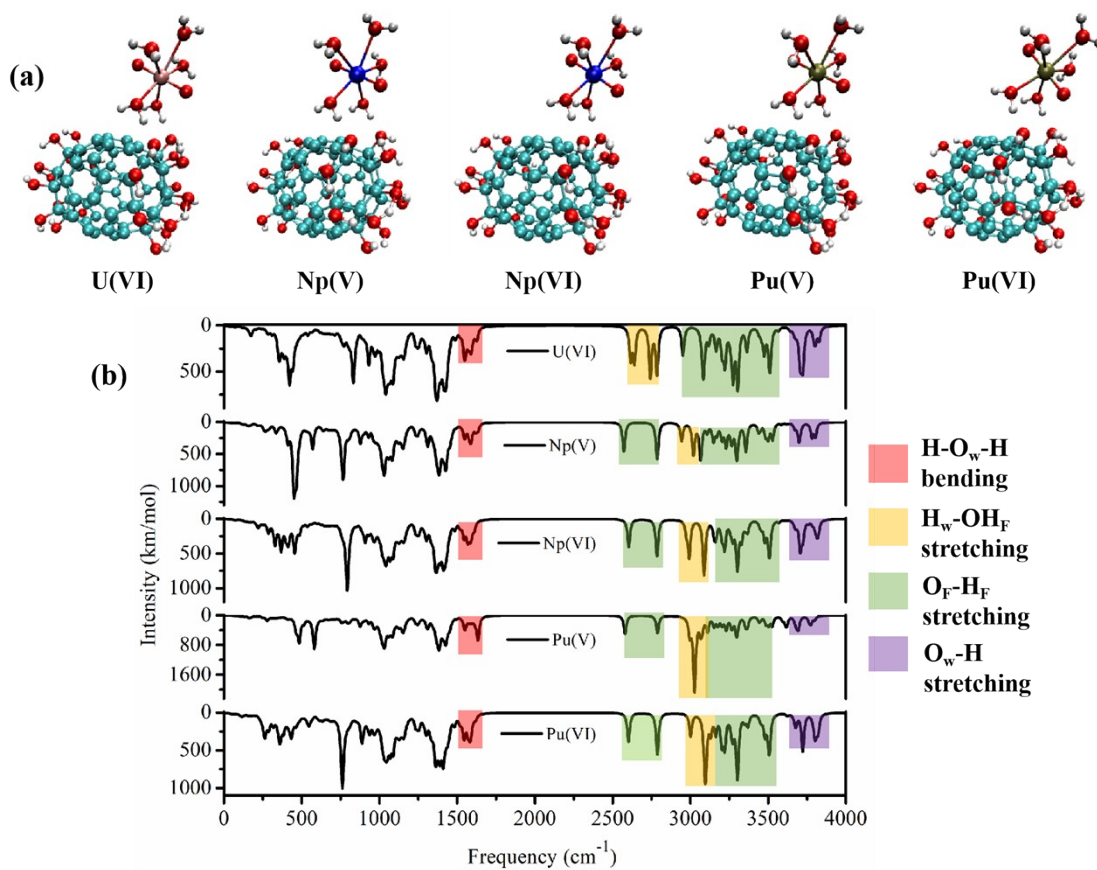

**Figure S6.** Structures (a) and IR spectra (b) of a typical isomer (egg-like shape) of  $C_{60}(OH)_{24}$  fullerene with actinyl ions adsorption.

**Table S1.** Cartesian coordinates of all relaxed complexes

| $C_{60}(OH)_{24}/UO_2(H_2O)_5^{2+}$ ( $C_{60}(OH)_{24}/U(VI)-OS$ ) |             |             |             |
|--------------------------------------------------------------------|-------------|-------------|-------------|
| C                                                                  | -1.93996340 | 3.53912904  | -1.38439724 |
| C                                                                  | -0.85812950 | 3.39922445  | -0.48539759 |
| C                                                                  | 0.29349477  | 4.17440881  | -0.63370892 |
| C                                                                  | 0.40251692  | 5.09661916  | -1.72980648 |
| C                                                                  | -0.66127622 | 5.18901715  | -2.63780161 |
| C                                                                  | -1.86468447 | 4.45133614  | -2.43556864 |
| C                                                                  | -2.94805256 | 2.43277331  | -1.25293263 |
| C                                                                  | -2.17409754 | 1.29292226  | -0.29027648 |
| C                                                                  | -0.85126255 | 2.05917049  | 0.24120187  |
| C                                                                  | 0.47218205  | 1.39336424  | -0.00962551 |
| C                                                                  | 1.59207598  | 3.53915999  | -0.49307906 |
| C                                                                  | 1.74556666  | 5.05417001  | -2.24089832 |
| C                                                                  | 1.96821739  | 5.11138965  | -3.61690080 |
| C                                                                  | 0.88390334  | 5.24949752  | -4.51298015 |
| C                                                                  | -0.42296778 | 5.32851894  | -4.03811282 |
| C                                                                  | -1.69458102 | 5.12826748  | -4.82433836 |
| C                                                                  | -2.73976465 | 4.49185753  | -3.66281013 |
| C                                                                  | -3.39658025 | 3.08587553  | -3.93396950 |
| C                                                                  | -3.49495765 | 1.98484703  | -2.66353220 |
| C                                                                  | -1.90877377 | -0.19797375 | -0.86157838 |
| C                                                                  | -2.31927213 | -0.42388193 | -2.41890480 |
| C                                                                  | -2.75073796 | 0.80004575  | -3.19896031 |
| C                                                                  | -2.44286040 | 0.94611812  | -4.53278097 |
| C                                                                  | -2.58837770 | 2.32520518  | -4.94735288 |
| C                                                                  | -1.73878820 | 2.83943522  | -5.88969201 |
| C                                                                  | -1.41388479 | 4.28934266  | -6.12756407 |
| C                                                                  | 0.15927654  | 4.21334355  | -6.71548528 |
| C                                                                  | 1.28166345  | 5.00195923  | -5.93707941 |
| C                                                                  | 2.46328335  | 4.06781694  | -1.45320543 |
| C                                                                  | 3.85937874  | 1.68525361  | -5.43491932 |
| C                                                                  | 4.38795207  | 2.13453837  | -4.02788178 |
| C                                                                  | 4.29731353  | 1.04068218  | -2.76443637 |
| C                                                                  | 3.68269767  | -0.37859979 | -3.03552638 |
| C                                                                  | 2.77953042  | -0.31681120 | -4.24207735 |
| C                                                                  | 1.75989204  | 0.73833466  | -6.18697741 |
| C                                                                  | 1.76210171  | 2.05604231  | -6.94533107 |
| C                                                                  | 3.07907512  | 2.83406776  | -6.40461908 |
| C                                                                  | 2.81242248  | 4.32090199  | -5.82475928 |
| C                                                                  | 3.21687472  | 4.52914723  | -4.26849395 |
| C                                                                  | 3.62432565  | 3.30669885  | -3.49739176 |

|   |             |             |             |
|---|-------------|-------------|-------------|
| C | 3.49124746  | 1.79309653  | -1.74783158 |
| C | 2.64217670  | 1.27724966  | -0.80720427 |
| C | 2.31101339  | -0.16569353 | -0.56205865 |
| C | 2.60488188  | -1.03447268 | -1.83837151 |
| C | 1.33730474  | -1.19526893 | -2.64208545 |
| C | 1.57844648  | -1.05357717 | -4.03839774 |
| C | 0.51223876  | -0.96053596 | -4.94637373 |
| C | 0.61544080  | -0.04206466 | -6.04478014 |
| C | 0.43357229  | 2.73736272  | -6.73572784 |
| C | -0.69463688 | 2.00196409  | -6.44119065 |
| C | -0.68320761 | 0.58938475  | -6.19659384 |
| C | -1.54645144 | 0.06700390  | -5.22353324 |
| C | -0.82902940 | -0.92410202 | -4.44014139 |
| C | -1.05278613 | -0.97506391 | -3.06593669 |
| C | 0.02744431  | -1.12627887 | -2.17018087 |
| C | -0.36783715 | -0.88499767 | -0.74485256 |
| C | 0.74231083  | -0.07901284 | 0.01133645  |
| C | 3.33064852  | 3.17456602  | -2.16164504 |
| C | 1.60677679  | 2.12752255  | -0.25119553 |
| C | 2.84783295  | 0.58982050  | -5.29798230 |
| O | -0.98406555 | 2.24406446  | 1.67159761  |
| O | -3.02002312 | 1.16752007  | 0.82037914  |
| O | -2.73292465 | -1.04845650 | -0.12607850 |
| O | -4.07348321 | 2.88273168  | -0.52751628 |
| O | -4.86207927 | 1.67730322  | -2.51067462 |
| O | -3.38957679 | -1.33654866 | -2.49178780 |
| O | -4.71939925 | 3.31778447  | -4.36557996 |
| O | -3.77163246 | 5.43526944  | -3.49935268 |
| O | 3.09705157  | -0.70198371 | 0.52530707  |
| O | 4.31470825  | 5.47547140  | -4.22422505 |
| O | 5.76189951  | 2.50127331  | -4.20868785 |
| O | 3.62871663  | 5.19717446  | -6.55620069 |
| O | 1.43960551  | 6.23791966  | -6.61448198 |
| O | 3.91951556  | 2.97412687  | -7.51849544 |
| O | 1.96047903  | 1.81668011  | -8.36131202 |
| O | 0.16689014  | 4.75490956  | -8.03143495 |
| O | -2.24915505 | 4.82542374  | -7.13950808 |
| O | -2.25575293 | 6.35679159  | -5.23728956 |
| O | -0.52977668 | -2.12341566 | -0.08019327 |
| O | 0.72412901  | -0.53330640 | 1.36922369  |
| O | 3.05925717  | -2.29378107 | -1.47027110 |
| O | 4.69051877  | -1.29924244 | -3.29138186 |
| O | 5.65602009  | 0.85040279  | -2.30892225 |
| O | 4.97571883  | 1.23741603  | -6.18538029 |

|   |             |             |              |
|---|-------------|-------------|--------------|
| H | -3.60576490 | -1.51445020 | -1.53871184  |
| H | -2.14461797 | -1.82467021 | 0.09829011   |
| H | -2.49361546 | 1.52953220  | 1.58528000   |
| H | -0.38877168 | 1.59823527  | 2.10211959   |
| H | -4.03024996 | 2.32865888  | 0.31045366   |
| H | -5.08013709 | 2.10865246  | -1.63155815  |
| H | -5.25511679 | 2.69384768  | -3.78986557  |
| H | 5.11908406  | 4.97215923  | -3.98871126  |
| H | 2.42438830  | 6.24968608  | -6.81764889  |
| H | 4.23305971  | 5.60388366  | -5.87200229  |
| H | 0.63042423  | 5.64020739  | -7.90322106  |
| H | -2.53931607 | 5.71069832  | -6.76752099  |
| H | -3.05085494 | 6.46208043  | -4.63677804  |
| H | -4.57950830 | 4.93907087  | -3.81773212  |
| H | -0.13224838 | -1.96764410 | 0.81572065   |
| H | 1.67171419  | -0.73560652 | 1.57655069   |
| H | 3.72113606  | -0.01877343 | 0.82918803   |
| H | 3.51564946  | -2.19399273 | -0.61072795  |
| H | 5.46357126  | -1.03669561 | -2.75357361  |
| H | 2.87521875  | 2.21986647  | -8.49851046  |
| H | 5.75421899  | 1.59381340  | -5.67719716  |
| H | 5.74131725  | 1.23287742  | -1.41700699  |
| H | 6.24182127  | 2.01355368  | -3.49023161  |
| H | 4.65496431  | 2.31078199  | -7.33693058  |
| U | -1.83178292 | 2.55654910  | -10.87078425 |
| O | -4.35887733 | 2.31146973  | -11.19941807 |
| O | -1.95069407 | 4.31146354  | -11.17415451 |
| O | -1.75239211 | 0.80000047  | -10.54787610 |
| O | 0.03995786  | 2.19371206  | -12.59872642 |
| O | -2.83947367 | 2.96804358  | -8.73892481  |
| O | -2.58042535 | 2.16374496  | -13.27278440 |
| H | 0.48978910  | 1.32928142  | -12.56501400 |
| H | 0.74732231  | 2.86464563  | -12.60082724 |
| H | -2.94459672 | 2.24914519  | -8.08653728  |
| H | -2.69012897 | 3.81993984  | -8.16782519  |
| H | -4.78161270 | 1.44578677  | -11.05335046 |
| H | -4.95004075 | 2.97852303  | -10.80596618 |
| H | -3.43399089 | 2.49953618  | -13.59638503 |
| H | -1.92624491 | 2.27292941  | -13.98505324 |
| O | 0.16782317  | 2.95493991  | -9.77766575  |
| H | 0.19376779  | 3.80339578  | -9.19497393  |
| H | 0.85427521  | 2.36199490  | -9.28468428  |

$C_{60}(OH)_{24}/UO_2(H_2O)_4^{2+}$  ( $C_{60}(OH)_{24}/U(VI)$ -IS1)



|   |             |             |             |
|---|-------------|-------------|-------------|
| C | -0.34057100 | 0.32497870  | -0.43941877 |
| C | 1.06428224  | 0.30067114  | -0.29610751 |
| C | 1.78497858  | 1.48659288  | -0.13360381 |
| C | 1.10057887  | 2.74908408  | -0.15321760 |
| C | -0.28812287 | 2.75612880  | -0.34640433 |
| C | -1.02633200 | 1.54001711  | -0.43119521 |
| C | -0.89938994 | -0.99261517 | -0.89636312 |
| C | 0.45861770  | -1.86440989 | -1.36742375 |
| C | 1.70190765  | -0.97050070 | -0.84462758 |
| C | 2.73813376  | -0.57825663 | -1.86040022 |
| C | 3.01597082  | 1.67003045  | -0.87947997 |
| C | 1.90284395  | 3.70354009  | -0.86823605 |
| C | 1.29082603  | 4.61327366  | -1.73228651 |
| C | -0.11299653 | 4.63149075  | -1.88097630 |
| C | -0.91272855 | 3.73752770  | -1.17246020 |
| C | -2.35658976 | 3.39042809  | -1.43408458 |
| C | -2.43783491 | 1.79262123  | -0.90243371 |
| C | -2.89449395 | 0.68125319  | -1.92417201 |
| C | -2.06840241 | -0.78792338 | -1.93744570 |
| C | 0.59323165  | -2.38088406 | -2.89536842 |
| C | -0.58392643 | -1.87722326 | -3.89897531 |
| C | -1.57471729 | -0.87301204 | -3.34918322 |
| C | -2.11248245 | 0.11832742  | -4.13983168 |
| C | -2.69916300 | 1.16749578  | -3.33467065 |
| C | -2.62944697 | 2.46591803  | -3.76232251 |
| C | -2.76526129 | 3.71198225  | -2.92659879 |
| C | -1.78219725 | 4.80534711  | -3.78541850 |
| C | -0.56136334 | 5.46910496  | -3.04035730 |
| C | 3.08906407  | 3.00009998  | -1.31763055 |
| C | 2.34473480  | 4.37090474  | -5.89979136 |
| C | 3.50285691  | 4.16434943  | -4.86028078 |
| C | 4.32057675  | 2.70269490  | -4.87242284 |
| C | 3.90126653  | 1.60823664  | -5.91697911 |
| C | 2.47746670  | 1.84376690  | -6.35429678 |
| C | 0.38038709  | 3.07341264  | -6.46974880 |
| C | -0.25804886 | 4.33817041  | -5.93699274 |
| C | 0.97823390  | 5.23957089  | -5.41529248 |
| C | 0.85149516  | 5.76264351  | -3.89566788 |
| C | 2.02812152  | 5.24980388  | -2.90351343 |
| C | 2.99843575  | 4.24361824  | -3.45379334 |
| C | 4.12229030  | 2.21438154  | -3.46914794 |
| C | 4.05296142  | 0.91680093  | -3.04058250 |
| C | 4.16337352  | -0.33107975 | -3.86627808 |
| C | 3.82081694  | -0.04034220 | -5.37302333 |

|   |             |             |             |
|---|-------------|-------------|-------------|
| C | 2.36865387  | -0.36378194 | -5.63127088 |
| C | 1.74470516  | 0.62585003  | -6.44518563 |
| C | 0.35351519  | 0.63011071  | -6.63531112 |
| C | -0.34329179 | 1.89211358  | -6.65178774 |
| C | -1.33767133 | 3.99524028  | -4.96355981 |
| C | -1.96462756 | 2.76144308  | -5.00668275 |
| C | -1.57969929 | 1.71354654  | -5.90456327 |
| C | -1.63247787 | 0.38875050  | -5.46045268 |
| C | -0.44696382 | -0.31906515 | -5.92241957 |
| C | 0.16238437  | -1.22708016 | -5.05954913 |
| C | 1.56714358  | -1.26004263 | -4.92644402 |
| C | 2.01579539  | -2.09383930 | -3.76371817 |
| C | 3.20923353  | -1.40805778 | -3.01429480 |
| C | 3.53336005  | 3.26072709  | -2.65384537 |
| C | 3.39563763  | 0.62488773  | -1.78086009 |
| C | 1.78879517  | 3.05431223  | -6.34655146 |
| O | 2.37534079  | -1.70667087 | 0.20463333  |
| O | 0.42741206  | -3.00099086 | -0.54852411 |
| O | 0.47976749  | -3.76905326 | -2.84918348 |
| O | -1.47133908 | -1.68517362 | 0.19245970  |
| O | -3.02649650 | -1.79240107 | -1.70426742 |
| O | -1.34436629 | -2.98453421 | -4.32082749 |
| O | -4.23908763 | 0.38342629  | -1.63646530 |
| O | -3.32053260 | 1.77510110  | 0.19097394  |
| O | 5.50224322  | -0.87122737 | -3.82020581 |
| O | 2.77013894  | 6.41908310  | -2.47389209 |
| O | 4.45063543  | 5.20998287  | -5.10775154 |
| O | 0.95698084  | 7.16039952  | -3.93594732 |
| O | -1.01630322 | 6.72901024  | -2.57170957 |
| O | 0.98688422  | 6.38087049  | -6.24892086 |
| O | -0.83086907 | 5.11877898  | -7.06861977 |
| O | -2.60698932 | 5.89217663  | -4.19389761 |
| O | -4.07328877 | 4.16820233  | -2.94555561 |
| O | -3.20150803 | 4.14200772  | -0.59781803 |
| O | 2.46439881  | -3.34991911 | -4.23239979 |
| O | 4.03808256  | -2.46485752 | -2.51989220 |
| O | 4.60718460  | -0.82218615 | -6.20777139 |
| O | 4.71214251  | 1.67850691  | -7.04303306 |
| O | 5.70655517  | 3.02895472  | -5.11900438 |
| O | 2.88308835  | 5.08407933  | -7.00408049 |
| H | -0.95872611 | -3.74003826 | -3.80349602 |
| H | 1.20503706  | -4.09746922 | -3.45199327 |
| H | 1.22143867  | -2.91132006 | 0.04652575  |
| H | 3.20314816  | -2.06236888 | -0.17566305 |

|   |             |             |              |
|---|-------------|-------------|--------------|
| H | -0.87523748 | -2.48809516 | 0.28377789   |
| H | -2.78653229 | -2.10881538 | -0.78421279  |
| H | -4.26349594 | -0.61593249 | -1.62337661  |
| H | 3.65224089  | 6.37505791  | -2.89118582  |
| H | -0.34852701 | 7.36767407  | -2.95839908  |
| H | 1.76179020  | 7.36295267  | -3.37756482  |
| H | -2.33240238 | 6.62111673  | -3.55820198  |
| H | -4.23486318 | 4.46417539  | -2.01441424  |
| H | -3.54032024 | 3.47528908  | 0.06333665   |
| H | -4.08090096 | 1.21773730  | -0.14179377  |
| H | 3.26673863  | -3.53900961 | -3.67910794  |
| H | 4.95461222  | -2.21859765 | -2.80332898  |
| H | 6.06816816  | -0.27115580 | -3.30207409  |
| H | 5.43758205  | -1.00945899 | -5.72453215  |
| H | 5.60359144  | 1.94104627  | -6.73866912  |
| H | -0.18125402 | 5.92965269  | -7.04805949  |
| H | 3.75327449  | 5.42367588  | -6.64951502  |
| H | 6.21837019  | 2.84107730  | -4.31133481  |
| H | 5.32414357  | 4.74171056  | -5.16015070  |
| H | 1.81461145  | 6.24094762  | -6.81473843  |
| U | -2.82134716 | 5.02828908  | -8.34889761  |
| O | -3.59632881 | 4.39330968  | -10.65992109 |
| O | -3.45023586 | 3.57756597  | -7.51846030  |
| O | -2.25449880 | 6.47985119  | -9.23022191  |
| O | -3.36940316 | 6.47160094  | -6.51236306  |
| O | -1.22240661 | 3.34056750  | -9.34024599  |
| O | -5.28120602 | 5.57502401  | -8.54874178  |
| H | -3.17430502 | 7.42120868  | -6.59440752  |
| H | -3.10492333 | 6.19015605  | -5.54201725  |
| H | -0.46682800 | 3.57767768  | -9.90615415  |
| H | -0.88112693 | 2.69778798  | -8.67832468  |
| H | -3.54111114 | 4.97302904  | -11.43927643 |
| H | -4.05974166 | 3.58117252  | -10.92880602 |
| H | -5.65910022 | 6.43518127  | -8.80250381  |
| H | -5.86935671 | 5.20032021  | -7.86806573  |

$C_{60}(OH)_{24}/UO_2(H_2O)_3^{2+}$  ( $C_{60}(OH)_{24}/U(VI)$ -IS2)

|   |             |             |             |
|---|-------------|-------------|-------------|
| C | -0.40316522 | 0.38248822  | -0.47128377 |
| C | 0.99942255  | 0.34502265  | -0.30112772 |
| C | 1.72712780  | 1.52482285  | -0.13469902 |
| C | 1.05631712  | 2.79407868  | -0.17497409 |
| C | -0.32837005 | 2.81496630  | -0.39242312 |
| C | -1.07547746 | 1.60347992  | -0.48367999 |
| C | -0.96586412 | -0.93421816 | -0.92716519 |

|   |             |             |             |
|---|-------------|-------------|-------------|
| C | 0.39202413  | -1.82295702 | -1.36698137 |
| C | 1.63455086  | -0.93727197 | -0.82785554 |
| C | 2.69246918  | -0.56311226 | -1.82785590 |
| C | 2.97417271  | 1.69011054  | -0.86057698 |
| C | 1.88158838  | 3.73452310  | -0.88274591 |
| C | 1.29762568  | 4.65032652  | -1.75820237 |
| C | -0.10622396 | 4.69002232  | -1.92500120 |
| C | -0.92649519 | 3.80308530  | -1.22996619 |
| C | -2.36483509 | 3.45718415  | -1.52727239 |
| C | -2.47358081 | 1.86236909  | -0.98524722 |
| C | -2.92465543 | 0.74528784  | -2.00372067 |
| C | -2.11486814 | -0.72975641 | -1.99023389 |
| C | 0.54957914  | -2.35309683 | -2.88797430 |
| C | -0.60491404 | -1.84824372 | -3.91647955 |
| C | -1.59845629 | -0.83137054 | -3.39343639 |
| C | -2.11546693 | 0.15258411  | -4.20651349 |
| C | -2.69957034 | 1.21407848  | -3.41466727 |
| C | -2.61147255 | 2.50753291  | -3.85668766 |
| C | -2.71960754 | 3.76772671  | -3.03511715 |
| C | -1.70893045 | 4.81038195  | -3.87361743 |
| C | -0.52107376 | 5.50091308  | -3.11723530 |
| C | 3.06935939  | 3.01403625  | -1.30620314 |
| C | 2.42347048  | 4.35423763  | -5.91674862 |
| C | 3.55552582  | 4.14302394  | -4.85024589 |
| C | 4.36091697  | 2.67782464  | -4.83682756 |
| C | 3.94785513  | 1.58214659  | -5.88212603 |
| C | 2.53457426  | 1.82952471  | -6.34927193 |
| C | 0.44863940  | 3.08441643  | -6.54090887 |
| C | -0.17881960 | 4.36217938  | -6.00997030 |
| C | 1.06461363  | 5.24327150  | -5.46048058 |
| C | 0.91146522  | 5.77337666  | -3.94442083 |
| C | 2.06192222  | 5.26104959  | -2.92704062 |
| C | 3.02521905  | 4.23666852  | -3.45343546 |
| C | 4.13397636  | 2.20104884  | -3.43317579 |
| C | 4.04569636  | 0.90816394  | -2.99533748 |
| C | 4.15595223  | -0.34646065 | -3.81120738 |
| C | 3.83999067  | -0.06133008 | -5.32532588 |
| C | 2.38889082  | -0.36965752 | -5.60502391 |
| C | 1.79100449  | 0.61901919  | -6.43760427 |
| C | 0.40388069  | 0.63732508  | -6.65314761 |
| C | -0.27617833 | 1.90174784  | -6.69613796 |
| C | -1.27211917 | 4.00100792  | -5.04729048 |
| C | -1.91178253 | 2.76951644  | -5.08666048 |
| C | -1.53193710 | 1.72855128  | -5.98174967 |

|   |             |             |             |
|---|-------------|-------------|-------------|
| C | -1.60542761 | 0.40767328  | -5.52032919 |
| C | -0.41631299 | -0.30694871 | -5.95024170 |
| C | 0.16702361  | -1.21410806 | -5.06941224 |
| C | 1.56786978  | -1.25523518 | -4.90816070 |
| C | 1.98911284  | -2.08546769 | -3.73308765 |
| C | 3.17538802  | -1.40677558 | -2.96738793 |
| C | 3.53993011  | 3.25857793  | -2.63668489 |
| C | 3.36123364  | 0.63304574  | -1.74623159 |
| C | 1.85509536  | 3.04504828  | -6.37173925 |
| O | 2.28011662  | -1.67118354 | 0.23912882  |
| O | 0.33246062  | -2.95126035 | -0.53867016 |
| O | 0.42205098  | -3.73916323 | -2.83159906 |
| O | -1.56320233 | -1.61129163 | 0.15698246  |
| O | -3.08771911 | -1.71954314 | -1.76311445 |
| O | -1.37937203 | -2.94847434 | -4.32804871 |
| O | -4.27762870 | 0.46644414  | -1.73724117 |
| O | -3.38409272 | 1.87285608  | 0.08585574  |
| O | 5.48643895  | -0.90252984 | -3.73820157 |
| O | 2.81505213  | 6.42427095  | -2.50264082 |
| O | 4.51610732  | 5.18228785  | -5.07325054 |
| O | 1.02148789  | 7.17099650  | -3.98260881 |
| O | -1.01205588 | 6.77730983  | -2.72936614 |
| O | 1.10778000  | 6.38084655  | -6.28926185 |
| O | -0.79233748 | 5.18052567  | -7.06218566 |
| O | -2.49161050 | 5.89711900  | -4.39181828 |
| O | -4.03367142 | 4.27921897  | -3.04626277 |
| O | -3.24737854 | 4.21231858  | -0.72817917 |
| O | 2.43251261  | -3.34967662 | -4.18395420 |
| O | 3.98412351  | -2.46594635 | -2.44707083 |
| O | 4.62811070  | -0.86049660 | -6.14158271 |
| O | 4.78222437  | 1.63276950  | -6.99069441 |
| O | 5.75349619  | 2.99104062  | -5.05925035 |
| O | 2.99447922  | 5.05359821  | -7.01172735 |
| H | -1.00779770 | -3.70405087 | -3.80028755 |
| H | 1.15221617  | -4.07907661 | -3.42290139 |
| H | 1.11867771  | -2.86833792 | 0.06771125  |
| H | 3.11342912  | -2.03535606 | -0.12104950 |
| H | -0.97485451 | -2.41916810 | 0.26473346  |
| H | -2.86362084 | -2.03397408 | -0.83776123 |
| H | -4.31195805 | -0.53400090 | -1.71517346 |
| H | 3.69826044  | 6.36744099  | -2.91737546 |
| H | -0.30157661 | 7.39999490  | -3.07725736 |
| H | 1.82616381  | 7.37323146  | -3.42342180 |
| H | -2.19225731 | 6.68063922  | -3.81378679 |

|   |             |             |             |
|---|-------------|-------------|-------------|
| H | -4.19070702 | 4.51463248  | -2.08427930 |
| H | -3.59880128 | 3.54228201  | -0.07013404 |
| H | -4.13774097 | 1.30782909  | -0.25290614 |
| H | 3.22294218  | -3.54450429 | -3.61625073 |
| H | 4.90795448  | -2.23191895 | -2.71823336 |
| H | 6.05368279  | -0.30406136 | -3.21977517 |
| H | 5.45242408  | -1.04983921 | -5.64942003 |
| H | 5.67223365  | 1.88321226  | -6.67323631 |
| H | -0.12782269 | 5.96376524  | -7.08468110 |
| H | 3.85454951  | 5.39706654  | -6.64110415 |
| H | 6.25051136  | 2.80342951  | -4.24247103 |
| H | 5.38651563  | 4.70665352  | -5.11362596 |
| H | 1.92868965  | 6.21662844  | -6.85768701 |
| U | -3.20362746 | 5.64508706  | -6.73740418 |
| O | -5.32935921 | 6.32186652  | -7.86081489 |
| O | -3.61331862 | 3.94707638  | -7.11474193 |
| O | -2.93713547 | 7.41387826  | -6.69277314 |
| O | -2.70435656 | 5.79539897  | -9.19434806 |
| O | -5.10960290 | 5.45655272  | -5.15583574 |
| H | -2.29657821 | 6.54450697  | -9.66221664 |
| H | -2.55259063 | 4.99680923  | -9.73002749 |
| H | -5.53351022 | 7.19728101  | -8.23240867 |
| H | -6.03291497 | 5.70650046  | -8.13203887 |
| H | -5.57759055 | 6.25425163  | -4.85557228 |
| H | -4.78797751 | 4.98370018  | -4.32195976 |

$C_{60}(OH)_{24}/NpO_2(H_2O)_5^{1+} (C_{60}(OH)_{24}/Np(V)-OS)$

|   |             |            |             |
|---|-------------|------------|-------------|
| C | -1.95058119 | 3.51713263 | -1.43397004 |
| C | -0.88653222 | 3.36780576 | -0.51628662 |
| C | 0.26972170  | 4.14561885 | -0.63744943 |
| C | 0.39470387  | 5.07956312 | -1.72249717 |
| C | -0.65453573 | 5.18113831 | -2.64626763 |
| C | -1.86181025 | 4.44370379 | -2.47152452 |
| C | -2.95938227 | 2.40919758 | -1.33481766 |
| C | -2.20194291 | 1.25877562 | -0.37385396 |
| C | -0.89076855 | 2.02007974 | 0.18966557  |
| C | 0.43589579  | 1.36173035 | -0.04456822 |
| C | 1.56680750  | 3.51766330 | -0.47593136 |
| C | 1.74632584  | 5.04868030 | -2.21177188 |
| C | 1.99027185  | 5.12455738 | -3.58625773 |
| C | 0.91878643  | 5.26520127 | -4.49614220 |
| C | -0.39477285 | 5.33861310 | -4.04048488 |
| C | -1.65286076 | 5.15085509 | -4.84825800 |
| C | -2.71511548 | 4.49823491 | -3.71293460 |

|   |             |             |             |
|---|-------------|-------------|-------------|
| C | -3.36298980 | 3.09536462  | -4.01331656 |
| C | -3.48083012 | 1.97764744  | -2.75764426 |
| C | -1.92579948 | -0.22464642 | -0.95805356 |
| C | -2.31392059 | -0.43716421 | -2.52484146 |
| C | -2.73075643 | 0.79876318  | -3.29551240 |
| C | -2.39842078 | 0.96612209  | -4.61776416 |
| C | -2.53852275 | 2.35090910  | -5.02398960 |
| C | -1.67577031 | 2.87927133  | -5.94360965 |
| C | -1.35545651 | 4.33399537  | -6.16291260 |
| C | 0.23360495  | 4.26502309  | -6.73213016 |
| C | 1.33772649  | 5.04283908  | -5.91835440 |
| C | 2.45536308  | 4.06154998  | -1.42158022 |
| C | 3.91310840  | 1.72608360  | -5.41184214 |
| C | 4.41561415  | 2.16042569  | -3.99233510 |
| C | 4.30266473  | 1.05306413  | -2.74468228 |
| C | 3.70090273  | -0.36578732 | -3.03942646 |
| C | 2.82092575  | -0.29434875 | -4.26172894 |
| C | 1.82829479  | 0.78640956  | -6.20648980 |
| C | 1.84258910  | 2.11028413  | -6.95489120 |
| C | 3.14868105  | 2.88477861  | -6.38162693 |
| C | 2.86849259  | 4.36475332  | -5.79002080 |
| C | 3.24700375  | 4.55402108  | -4.22620429 |
| C | 3.64537243  | 3.32643567  | -3.46288356 |
| C | 3.48109757  | 1.79371261  | -1.73345166 |
| C | 2.61737895  | 1.26467237  | -0.81242793 |
| C | 2.28640215  | -0.18129193 | -0.59375573 |
| C | 2.60579776  | -1.03676678 | -1.87044668 |
| C | 1.35277265  | -1.19445726 | -2.69592844 |
| C | 1.61737451  | -1.03604872 | -4.08680245 |
| C | 0.56672315  | -0.93250282 | -5.01009081 |
| C | 0.68462181  | 0.00202019  | -6.09338500 |
| C | 0.50839694  | 2.78847810  | -6.75655369 |
| C | -0.62208472 | 2.05108073  | -6.49354702 |
| C | -0.61310036 | 0.63499111  | -6.25747271 |
| C | -1.49108250 | 0.09787922  | -5.31189098 |
| C | -0.78344015 | -0.90061936 | -4.52621864 |
| C | -1.03077985 | -0.96798106 | -3.15766888 |
| C | 0.03595504  | -1.13059141 | -2.24601085 |
| C | -0.38390559 | -0.90706285 | -0.82585184 |
| C | 0.71084164  | -0.10764380 | -0.04239993 |
| C | 3.33089621  | 3.17995924  | -2.12962085 |
| C | 1.57508296  | 2.10481009  | -0.25766120 |
| C | 2.90308448  | 0.62671178  | -5.30298110 |
| O | -1.05089603 | 2.18364174  | 1.62828183  |

|   |             |             |             |
|---|-------------|-------------|-------------|
| O | -3.06693458 | 1.11841519  | 0.72512505  |
| O | -2.75448539 | -1.08641097 | -0.23486205 |
| O | -4.09728875 | 2.85273489  | -0.61619879 |
| O | -4.85624398 | 1.67273075  | -2.62748563 |
| O | -3.35962187 | -1.37880558 | -2.61826715 |
| O | -4.68410725 | 3.33099087  | -4.46034248 |
| O | -3.75790673 | 5.43581022  | -3.55349341 |
| O | 3.06807802  | -0.72019007 | 0.50363572  |
| O | 4.34949016  | 5.50385878  | -4.14978252 |
| O | 5.79916394  | 2.52663080  | -4.14331240 |
| O | 3.69749612  | 5.25169183  | -6.49823855 |
| O | 1.50396708  | 6.29727030  | -6.55960452 |
| O | 4.01198656  | 3.04384765  | -7.47580152 |
| O | 2.05898655  | 1.87704849  | -8.36020907 |
| O | 0.26809428  | 4.80300446  | -8.04032903 |
| O | -2.17634650 | 4.87922533  | -7.17798359 |
| O | -2.20387673 | 6.39326052  | -5.24006842 |
| O | -0.55058411 | -2.15684599 | -0.17466195 |
| O | 0.68042382  | -0.59017023 | 1.31221390  |
| O | 3.06191306  | -2.29854844 | -1.49881146 |
| O | 4.72468700  | -1.27861870 | -3.27914432 |
| O | 5.65597187  | 0.86280397  | -2.25544594 |
| O | 5.04567811  | 1.28233024  | -6.14607654 |
| H | -3.58080909 | -1.56702993 | -1.67080344 |
| H | -2.15907010 | -1.85829482 | -0.01597541 |
| H | -2.54452900 | 1.47632378  | 1.49573924  |
| H | -0.45878566 | 1.52605582  | 2.04489580  |
| H | -4.06083516 | 2.28206485  | 0.21059031  |
| H | -5.08105016 | 2.10046487  | -1.74943763 |
| H | -5.22041553 | 2.69822360  | -3.89451506 |
| H | 5.14502304  | 4.98118518  | -3.92692461 |
| H | 2.48541414  | 6.30274252  | -6.76752105 |
| H | 4.28032027  | 5.65343633  | -5.79412113 |
| H | 0.67740083  | 5.70388764  | -7.90518638 |
| H | -2.45396402 | 5.76269725  | -6.80435650 |
| H | -3.01552594 | 6.47362241  | -4.65995021 |
| H | -4.55091558 | 4.93231954  | -3.89953363 |
| H | -0.16004018 | -2.00085537 | 0.72459667  |
| H | 1.62883837  | -0.78810338 | 1.51819885  |
| H | 3.66047855  | -0.01584785 | 0.82186660  |
| H | 3.52105614  | -2.18703859 | -0.64282514 |
| H | 5.47842134  | -1.00466056 | -2.72057102 |
| H | 2.95659041  | 2.30143956  | -8.49977173 |
| H | 5.80963367  | 1.64482056  | -5.62177950 |



|    |             |            |              |
|----|-------------|------------|--------------|
| H  | 5.70558760  | 1.25128879 | -1.36367551  |
| H  | 6.25729543  | 2.02895138 | -3.41862195  |
| H  | 4.73176473  | 2.36631460 | -7.29959943  |
| Np | -2.01835615 | 2.47804643 | -10.79504140 |
| O  | -4.59914038 | 2.46737951 | -10.83599822 |
| O  | -2.09571422 | 4.21252603 | -11.25398016 |
| O  | -1.93529261 | 0.73921551 | -10.34563413 |
| O  | -0.02366487 | 2.10655441 | -12.42176550 |
| O  | -3.17189187 | 2.95365122 | -8.58963976  |
| O  | -2.87705874 | 1.86592067 | -13.10767268 |
| H  | 0.30710970  | 1.19364026 | -12.35414034 |
| H  | 0.55541910  | 2.62717739 | -11.81932344 |
| H  | -3.17259827 | 2.24942976 | -7.91582493  |
| H  | -2.89940134 | 3.78820908 | -8.08153090  |
| H  | -4.71103793 | 2.77794057 | -9.91332777  |
| H  | -4.95789567 | 3.17197205 | -11.40232895 |
| H  | -3.10957159 | 0.93943171 | -13.28836920 |
| H  | -2.31998568 | 2.16783676 | -13.84606738 |
| O  | 0.23723158  | 2.99487266 | -9.89879529  |
| H  | 0.25194205  | 3.83619037 | -9.35118337  |
| H  | 0.86405928  | 2.41311712 | -9.36811677  |

$C_{60}(OH)_{24}/NpO_2(H_2O)_4^{1+}$  ( $C_{60}(OH)_{24}/Np(V)$ -IS1)

|   |             |             |             |
|---|-------------|-------------|-------------|
| C | -0.35075487 | 0.32289486  | -0.46222307 |
| C | 1.05188822  | 0.27451437  | -0.30683529 |
| C | 1.78938026  | 1.44930374  | -0.12512561 |
| C | 1.12186937  | 2.72166220  | -0.13405871 |
| C | -0.26546287 | 2.75063411  | -0.33673578 |
| C | -1.02039020 | 1.54655560  | -0.44085327 |
| C | -0.92555508 | -0.97973665 | -0.93975439 |
| C | 0.42115769  | -1.86539143 | -1.41226114 |
| C | 1.67209136  | -0.99651128 | -0.86933337 |
| C | 2.72033213  | -0.60681510 | -1.86924485 |
| C | 3.03046823  | 1.62508389  | -0.85329108 |
| C | 1.94214833  | 3.67519189  | -0.83000734 |
| C | 1.34707952  | 4.60714923  | -1.68576011 |
| C | -0.05509477 | 4.64380536  | -1.84446250 |
| C | -0.87163640 | 3.75233907  | -1.15203617 |
| C | -2.31747238 | 3.42748167  | -1.42990095 |
| C | -2.42341769 | 1.82514632  | -0.92063631 |
| C | -2.88725760 | 0.73396821  | -1.95924468 |
| C | -2.07991997 | -0.74840267 | -1.98540850 |
| C | 0.55932669  | -2.36733291 | -2.94466078 |
| C | -0.60553242 | -1.84168406 | -3.95367581 |

|   |             |             |             |
|---|-------------|-------------|-------------|
| C | -1.58164622 | -0.82713511 | -3.39485931 |
| C | -2.09434036 | 0.18369204  | -4.16998685 |
| C | -2.67879131 | 1.23618808  | -3.36041196 |
| C | -2.58875057 | 2.53577018  | -3.76812802 |
| C | -2.71048504 | 3.77719817  | -2.92015035 |
| C | -1.70262463 | 4.86187475  | -3.76184259 |
| C | -0.48648022 | 5.50107140  | -2.99594878 |
| C | 3.12305618  | 2.96353494  | -1.27636430 |
| C | 2.42736623  | 4.39941462  | -5.85151568 |
| C | 3.56809900  | 4.16197487  | -4.80280223 |
| C | 4.36488176  | 2.69145397  | -4.82637189 |
| C | 3.94585356  | 1.61554144  | -5.88842617 |
| C | 2.53081069  | 1.87653897  | -6.33874106 |
| C | 0.45089887  | 3.13807011  | -6.45096297 |
| C | -0.17627865 | 4.41144958  | -5.91431924 |
| C | 1.07071669  | 5.28729517  | -5.37008898 |
| C | 0.93626033  | 5.78667520  | -3.83860719 |
| C | 2.09631844  | 5.24404930  | -2.84707492 |
| C | 3.05384278  | 4.23099838  | -3.40108484 |
| C | 4.15155656  | 2.19005277  | -3.43066966 |
| C | 4.06270685  | 0.88771156  | -3.01825269 |
| C | 4.16011385  | -0.34839450 | -3.86104015 |
| C | 3.83838706  | -0.03669742 | -5.36597075 |
| C | 2.38598368  | -0.33929086 | -5.64099663 |
| C | 1.78256188  | 0.66904764  | -6.44883588 |
| C | 0.39401470  | 0.69594231  | -6.64728943 |
| C | -0.28489544 | 1.96738516  | -6.64982857 |
| C | -1.24857149 | 4.04910153  | -4.93223244 |
| C | -1.90275103 | 2.84086967  | -5.00307776 |
| C | -1.52674958 | 1.79432804  | -5.90924546 |
| C | -1.60897103 | 0.46806134  | -5.48944563 |
| C | -0.42690039 | -0.24879126 | -5.94872465 |
| C | 0.16166944  | -1.17418668 | -5.09146726 |
| C | 1.56658541  | -1.22919892 | -4.95140942 |
| C | 1.99321305  | -2.08408749 | -3.79757448 |
| C | 3.18791164  | -1.42407869 | -3.03073766 |
| C | 3.57551184  | 3.23420974  | -2.60610155 |
| C | 3.39584702  | 0.58780047  | -1.76687766 |
| C | 1.85796612  | 3.09580084  | -6.31874394 |
| O | 2.33300788  | -1.76262969 | 0.17741795  |
| O | 0.37036553  | -3.01377665 | -0.60325102 |
| O | 0.44177563  | -3.75912669 | -2.90885969 |
| O | -1.50876216 | -1.67668681 | 0.14716665  |
| O | -3.05998908 | -1.74240823 | -1.75681708 |

|    |             |             |             |
|----|-------------|-------------|-------------|
| O  | -1.34034134 | -2.94882527 | -4.42726658 |
| O  | -4.23914410 | 0.44312856  | -1.67423869 |
| O  | -3.31956819 | 1.80174316  | 0.16736086  |
| O  | 5.50182118  | -0.89813426 | -3.80465327 |
| O  | 2.86915436  | 6.39493266  | -2.39958837 |
| O  | 4.53898897  | 5.20088621  | -5.02025952 |
| O  | 1.06160858  | 7.18637125  | -3.85309795 |
| O  | -0.92609011 | 6.75923412  | -2.50518270 |
| O  | 1.11115384  | 6.44373046  | -6.17137237 |
| O  | -0.75770704 | 5.18356465  | -7.01293240 |
| O  | -2.49207824 | 5.95543347  | -4.20291566 |
| O  | -4.01122329 | 4.26397525  | -2.93670946 |
| O  | -3.15655782 | 4.17719441  | -0.57923128 |
| O  | 2.43532545  | -3.34322323 | -4.27842612 |
| O  | 4.00962933  | -2.50073499 | -2.54822957 |
| O  | 4.63094349  | -0.82212691 | -6.19823717 |
| O  | 4.78173688  | 1.68912524  | -7.00036950 |
| O  | 5.76548150  | 3.00042561  | -5.04712172 |
| O  | 2.99415750  | 5.10700810  | -6.94747083 |
| H  | -0.95934160 | -3.70921265 | -3.91936952 |
| H  | 1.17144109  | -4.07602452 | -3.51174652 |
| H  | 1.16555838  | -2.93191716 | -0.00803993 |
| H  | 3.15232960  | -2.11943500 | -0.21967690 |
| H  | -0.92054452 | -2.48674191 | 0.22190248  |
| H  | -2.82535454 | -2.06002538 | -0.83731376 |
| H  | -4.25776472 | -0.55756208 | -1.66697266 |
| H  | 3.72996994  | 6.34456943  | -2.85918107 |
| H  | -0.25498830 | 7.39095953  | -2.89496293 |
| H  | 1.86206244  | 7.36366684  | -3.28347710 |
| H  | -2.26555489 | 6.67190395  | -3.54733908 |
| H  | -4.16464792 | 4.54858295  | -2.00255147 |
| H  | -3.51470381 | 3.49264345  | 0.05293893  |
| H  | -4.07562422 | 1.25266869  | -0.19393061 |
| H  | 3.23144964  | -3.53657045 | -3.71785422 |
| H  | 4.92520851  | -2.25033480 | -2.83052692 |
| H  | 6.04441748  | -0.30762110 | -3.25210987 |
| H  | 5.46233155  | -0.98990309 | -5.71128006 |
| H  | 5.66438339  | 1.94576721  | -6.66791772 |
| H  | -0.16826042 | 6.00456427  | -7.02209162 |
| H  | 3.85354510  | 5.44480285  | -6.57325526 |
| H  | 6.24768464  | 2.79043801  | -4.22719529 |
| H  | 5.40134841  | 4.71411924  | -5.06943322 |
| H  | 1.91419485  | 6.29193166  | -6.75521370 |
| Np | -2.81631387 | 4.98801678  | -8.36137149 |

|   |             |            |              |
|---|-------------|------------|--------------|
| O | -3.63242114 | 3.79920979 | -10.49129460 |
| O | -3.42995626 | 3.55197452 | -7.47036587  |
| O | -2.21988000 | 6.42743177 | -9.26541286  |
| O | -3.58402654 | 6.44885059 | -6.50341429  |
| O | -1.07225954 | 3.35797884 | -9.42339203  |
| O | -5.27304677 | 5.54500979 | -8.78700117  |
| H | -3.30131120 | 7.37238868 | -6.61217853  |
| H | -3.26457654 | 6.18156172 | -5.57932594  |
| H | -0.23430136 | 3.78059462 | -9.68208342  |
| H | -0.82518822 | 2.71165063 | -8.72611925  |
| H | -2.90480573 | 3.19330899 | -10.72595553 |
| H | -4.40396804 | 3.23448783 | -10.31197572 |
| H | -5.48254575 | 6.38277140 | -9.23407269  |
| H | -5.76867742 | 5.55047727 | -7.94866442  |

$C_{60}(OH)_{24}/NpO_2(H_2O)_3^{1+}$  ( $C_{60}(OH)_{24}/Np(V)$ -IS2)

|   |             |             |             |
|---|-------------|-------------|-------------|
| C | -0.44360372 | 0.38959139  | -0.50870676 |
| C | 0.95452357  | 0.34761188  | -0.31119584 |
| C | 1.68222985  | 1.52932475  | -0.13638892 |
| C | 1.01187343  | 2.79898174  | -0.19106685 |
| C | -0.36937684 | 2.82084285  | -0.43119538 |
| C | -1.11620656 | 1.61036153  | -0.53127171 |
| C | -1.00143790 | -0.92624395 | -0.97003897 |
| C | 0.35986833  | -1.81791357 | -1.38587567 |
| C | 1.59327398  | -0.93358864 | -0.82708090 |
| C | 2.66744821  | -0.56291043 | -1.80569249 |
| C | 2.94348974  | 1.69321926  | -0.83255005 |
| C | 1.84927779  | 3.74047310  | -0.88351086 |
| C | 1.27705052  | 4.65998654  | -1.76752693 |
| C | -0.12364627 | 4.69998936  | -1.95452791 |
| C | -0.95583894 | 3.81230972  | -1.27304598 |
| C | -2.38911674 | 3.46480060  | -1.59411282 |
| C | -2.50524974 | 1.87032122  | -1.05445240 |
| C | -2.94259077 | 0.75125090  | -2.07696508 |
| C | -2.12919542 | -0.72606343 | -2.05040161 |
| C | 0.54136819  | -2.35300017 | -2.90233522 |
| C | -0.59852147 | -1.85613853 | -3.95396310 |
| C | -1.59442297 | -0.83375483 | -3.44486114 |
| C | -2.09083397 | 0.15420730  | -4.25887309 |
| C | -2.70179643 | 1.21973172  | -3.48350673 |
| C | -2.60294844 | 2.50888180  | -3.91976947 |
| C | -2.72004547 | 3.77677646  | -3.10759913 |
| C | -1.67974679 | 4.80430540  | -3.93140164 |
| C | -0.52252613 | 5.51090010  | -3.15332493 |

|   |             |             |             |
|---|-------------|-------------|-------------|
| C | 3.04471696  | 3.02256770  | -1.28169987 |
| C | 2.46683457  | 4.35058481  | -5.91081520 |
| C | 3.57484292  | 4.13923278  | -4.82222225 |
| C | 4.37708694  | 2.67551205  | -4.79176915 |
| C | 3.99003197  | 1.57732563  | -5.84264896 |
| C | 2.58803393  | 1.82389961  | -6.34181963 |
| C | 0.50602544  | 3.08011338  | -6.56976394 |
| C | -0.13119615 | 4.35426039  | -6.03078059 |
| C | 1.10169996  | 5.24169044  | -5.48005777 |
| C | 0.92451147  | 5.77706597  | -3.96289757 |
| C | 2.05493401  | 5.26366631  | -2.92857282 |
| C | 3.02278708  | 4.23813021  | -3.43623254 |
| C | 4.12926772  | 2.20385601  | -3.39102944 |
| C | 4.03478112  | 0.91117355  | -2.95190035 |
| C | 4.15707911  | -0.34150269 | -3.76612038 |
| C | 3.87264039  | -0.06243002 | -5.28541359 |
| C | 2.42902447  | -0.37455941 | -5.59140719 |
| C | 1.84603094  | 0.61201635  | -6.43993637 |
| C | 0.46402202  | 0.63041056  | -6.67694671 |
| C | -0.21566690 | 1.89584320  | -6.73204137 |
| C | -1.17051194 | 3.95423720  | -5.03647014 |
| C | -1.85918252 | 2.77190048  | -5.13091305 |
| C | -1.47935811 | 1.72499120  | -6.02898796 |
| C | -1.56913663 | 0.40932293  | -5.57295917 |
| C | -0.37055569 | -0.30788151 | -5.98044817 |
| C | 0.19590653  | -1.21058027 | -5.08623845 |
| C | 1.59644801  | -1.25409148 | -4.90480632 |
| C | 1.99547235  | -2.08229607 | -3.72234644 |
| C | 3.16710395  | -1.40245070 | -2.93784930 |
| C | 3.52947707  | 3.26366254  | -2.60502654 |
| C | 3.33632221  | 0.63655727  | -1.71218848 |
| C | 1.90966552  | 3.03979518  | -6.37801191 |
| O | 2.22494431  | -1.67589393 | 0.25504389  |
| O | 0.28834991  | -2.94780779 | -0.55256568 |
| O | 0.42800885  | -3.74405195 | -2.83805456 |
| O | -1.61062496 | -1.59973150 | 0.11750058  |
| O | -3.11200624 | -1.71680909 | -1.82183448 |
| O | -1.32319247 | -2.97566278 | -4.41217322 |
| O | -4.29970523 | 0.46201600  | -1.81484064 |
| O | -3.43590742 | 1.87677414  | 0.00594640  |
| O | 5.49858507  | -0.88532992 | -3.66292710 |
| O | 2.81927475  | 6.42641490  | -2.49456504 |
| O | 4.54823918  | 5.18013800  | -5.02685199 |
| O | 1.04214524  | 7.17682179  | -4.00294045 |

|    |             |             |             |
|----|-------------|-------------|-------------|
| O  | -1.01723217 | 6.78568184  | -2.77143463 |
| O  | 1.15716091  | 6.37988209  | -6.30451569 |
| O  | -0.78757699 | 5.15617615  | -7.06276723 |
| O  | -2.44237654 | 5.86206121  | -4.52157047 |
| O  | -4.02921557 | 4.30253829  | -3.14581327 |
| O  | -3.28292070 | 4.21807367  | -0.79925027 |
| O  | 2.45396029  | -3.35073900 | -4.16285058 |
| O  | 3.98006255  | -2.46518959 | -2.41127789 |
| O  | 4.68672051  | -0.86615826 | -6.07906049 |
| O  | 4.86029684  | 1.62744120  | -6.92906193 |
| O  | 5.78299142  | 2.98515433  | -4.97888911 |
| O  | 3.06623373  | 5.04227770  | -6.99983469 |
| H  | -0.94888789 | -3.72281081 | -3.87996195 |
| H  | 1.17481884  | -4.07004463 | -3.41543426 |
| H  | 1.06984254  | -2.85232889 | 0.05913363  |
| H  | 3.05830527  | -2.03466807 | -0.10998910 |
| H  | -1.01978928 | -2.40532232 | 0.22513867  |
| H  | -2.89552961 | -2.01445249 | -0.89062766 |
| H  | -4.31196763 | -0.53967623 | -1.78348895 |
| H  | 3.68817251  | 6.36358595  | -2.93796608 |
| H  | -0.30897331 | 7.40462615  | -3.12060992 |
| H  | 1.83174680  | 7.37085185  | -3.42303661 |
| H  | -2.20681854 | 6.65817332  | -3.95803094 |
| H  | -4.19973431 | 4.53223369  | -2.18915903 |
| H  | -3.64740446 | 3.53467216  | -0.16308483 |
| H  | -4.17462248 | 1.30513478  | -0.35935979 |
| H  | 3.23642164  | -3.52789566 | -3.57828960 |
| H  | 4.90137577  | -2.21662662 | -2.67668348 |
| H  | 6.02498798  | -0.28039347 | -3.11042078 |
| H  | 5.50913654  | -1.01476927 | -5.57153274 |
| H  | 5.73330758  | 1.88833299  | -6.57590421 |
| H  | -0.16176614 | 5.94757402  | -7.10327846 |
| H  | 3.90745304  | 5.39725936  | -6.60249927 |
| H  | 6.24117254  | 2.79721639  | -4.14014036 |
| H  | 5.41281866  | 4.69494548  | -5.04810081 |
| H  | 1.96802298  | 6.21032370  | -6.87389233 |
| Np | -3.31064949 | 5.78070487  | -6.88346744 |
| O  | -5.46505997 | 6.20476267  | -8.11963422 |
| O  | -3.64547155 | 4.02532955  | -7.06256586 |
| O  | -3.02601999 | 7.55536442  | -6.83072706 |
| O  | -2.68189732 | 5.66173337  | -9.36316517 |
| O  | -5.16787041 | 5.69610583  | -5.19015164 |
| H  | -1.99932721 | 6.23537399  | -9.74993057 |
| H  | -2.44815985 | 4.74982563  | -9.61068561 |

|   |             |            |             |
|---|-------------|------------|-------------|
| H | -5.61423214 | 6.87726874 | -8.80369012 |
| H | -6.06665397 | 5.46300293 | -8.29872557 |
| H | -5.47124860 | 6.53460891 | -4.80574811 |
| H | -4.80604840 | 5.15714202 | -4.42717300 |

$C_{60}(OH)_{24}/NpO_2(H_2O)_5^{2+}$  ( $C_{60}(OH)_{24}/Np(VI)-OS$ )

|   |             |             |             |
|---|-------------|-------------|-------------|
| C | -1.94752018 | 3.52274889  | -1.38994675 |
| C | -0.86893872 | 3.39042804  | -0.48580907 |
| C | 0.27963858  | 4.17054795  | -0.63102768 |
| C | 0.38930378  | 5.08967651  | -1.72961900 |
| C | -0.67053733 | 5.17375333  | -2.64300050 |
| C | -1.87150660 | 4.43157991  | -2.44407266 |
| C | -2.95090213 | 2.41210876  | -1.25951101 |
| C | -2.17562568 | 1.27898701  | -0.28968857 |
| C | -0.85898851 | 2.05324731  | 0.24586023  |
| C | 0.46880334  | 1.39246799  | 0.00382365  |
| C | 1.58060956  | 3.54216183  | -0.48205476 |
| C | 1.73492699  | 5.05262974  | -2.23402762 |
| C | 1.96367338  | 5.10624441  | -3.60918898 |
| C | 0.88291348  | 5.23495049  | -4.51089979 |
| C | -0.42636862 | 5.30911958  | -4.04267155 |
| C | -1.69333332 | 5.10315033  | -4.83452999 |
| C | -2.74128165 | 4.46546530  | -3.67545435 |
| C | -3.39010044 | 3.05570653  | -3.94582898 |
| C | -3.48944243 | 1.95831170  | -2.67274169 |
| C | -1.89945816 | -0.21129468 | -0.85638643 |
| C | -2.29918229 | -0.44051495 | -2.41481436 |
| C | -2.73469457 | 0.77694576  | -3.20039609 |
| C | -2.42025084 | 0.92043839  | -4.53616174 |
| C | -2.57309307 | 2.29620040  | -4.95350592 |
| C | -1.72121370 | 2.81262130  | -5.89494537 |
| C | -1.40469164 | 4.26343461  | -6.13730792 |
| C | 0.17294413  | 4.19281487  | -6.71843078 |
| C | 1.28904272  | 4.98732828  | -5.93245330 |
| C | 2.45352589  | 4.07202099  | -1.44006968 |
| C | 3.87993055  | 1.68514452  | -5.40822479 |
| C | 4.40008428  | 2.14072607  | -4.00001322 |
| C | 4.30880454  | 1.05023328  | -2.73354401 |
| C | 3.70157894  | -0.37266758 | -3.00319529 |
| C | 2.80341947  | -0.31865355 | -4.21415065 |
| C | 1.78925090  | 0.72577783  | -6.16831372 |
| C | 1.78835900  | 2.04166867  | -6.93168713 |
| C | 3.09987029  | 2.82773928  | -6.38457424 |
| C | 2.82279105  | 4.31490982  | -5.81077784 |

|   |             |             |             |
|---|-------------|-------------|-------------|
| C | 3.21872865  | 4.52922092  | -4.25308676 |
| C | 3.62830205  | 3.31075839  | -3.47633276 |
| C | 3.49410992  | 1.80162282  | -1.72292005 |
| C | 2.64312705  | 1.28453209  | -0.78457874 |
| C | 2.31794565  | -0.15926331 | -0.53650564 |
| C | 2.62158999  | -1.03025276 | -1.80913397 |
| C | 1.35864045  | -1.19923580 | -2.61833102 |
| C | 1.60512092  | -1.05944999 | -4.01347550 |
| C | 0.54211792  | -0.97370486 | -4.92755080 |
| C | 0.64775560  | -0.05959693 | -6.02906185 |
| C | 0.45403333  | 2.71766650  | -6.72775290 |
| C | -0.67445649 | 1.97655400  | -6.43982324 |
| C | -0.65195502 | 0.56660470  | -6.18711030 |
| C | -1.52008855 | 0.04084497  | -5.21785969 |
| C | -0.80168595 | -0.94401893 | -4.42790815 |
| C | -1.03043236 | -0.99248922 | -3.05437399 |
| C | 0.04608774  | -1.13527500 | -2.15285341 |
| C | -0.35700864 | -0.89158493 | -0.72990002 |
| C | 0.74603321  | -0.07867174 | 0.02982798  |
| C | 3.32894186  | 3.18111398  | -2.14159187 |
| C | 1.60092109  | 2.13137340  | -0.23583036 |
| C | 2.87244332  | 0.58541407  | -5.27315758 |
| O | -1.00177182 | 2.24328182  | 1.67439364  |
| O | -3.02603393 | 1.15120245  | 0.81669583  |
| O | -2.72563240 | -1.06499332 | -0.12724977 |
| O | -4.08275032 | 2.85654442  | -0.54191587 |
| O | -4.85404711 | 1.64132957  | -2.52612087 |
| O | -3.37412646 | -1.34815121 | -2.49295842 |
| O | -4.71062805 | 3.27978337  | -4.38612895 |
| O | -3.77760344 | 5.40438434  | -3.51826848 |
| O | 3.10145457  | -0.68946799 | 0.55514213  |
| O | 4.31090221  | 5.48108452  | -4.20523077 |
| O | 5.77235400  | 2.51387299  | -4.17627941 |
| O | 3.63735904  | 5.19307301  | -6.54092943 |
| O | 1.44278102  | 6.22268750  | -6.60878297 |
| O | 3.94307456  | 2.96951956  | -7.49398441 |
| O | 1.97954736  | 1.81059376  | -8.34114911 |
| O | 0.19076466  | 4.72106230  | -8.03381723 |
| O | -2.23831429 | 4.78771901  | -7.15242550 |
| O | -2.25449792 | 6.32936080  | -5.25085989 |
| O | -0.51803471 | -2.12868613 | -0.06341040 |
| O | 0.72371562  | -0.53166820 | 1.38767824  |
| O | 3.07908171  | -2.28667351 | -1.43618710 |
| O | 4.71387576  | -1.28977529 | -3.25227146 |



|    |             |             |              |
|----|-------------|-------------|--------------|
| O  | 5.66610217  | 0.86695834  | -2.27248714  |
| O  | 4.99986144  | 1.23673325  | -6.15159928  |
| H  | -3.59927662 | -1.52028098 | -1.53972166  |
| H  | -2.13578588 | -1.83877175 | 0.10299511   |
| H  | -2.50598959 | 1.51993569  | 1.58307600   |
| H  | -0.40349300 | 1.60517338  | 2.11208213   |
| H  | -4.04181379 | 2.30487575  | 0.29779320   |
| H  | -5.08021484 | 2.07430882  | -1.64971188  |
| H  | -5.24886014 | 2.65279204  | -3.81742110  |
| H  | 5.11762929  | 4.98288123  | -3.96695000  |
| H  | 2.42725054  | 6.23842145  | -6.81246457  |
| H  | 4.23621526  | 5.60617060  | -5.85616556  |
| H  | 0.63916746  | 5.61252784  | -7.90903086  |
| H  | -2.52643384 | 5.67623228  | -6.79035894  |
| H  | -3.05314079 | 6.43492848  | -4.65608244  |
| H  | -4.58241742 | 4.90669523  | -3.84060239  |
| H  | -0.12405964 | -1.96984959 | 0.83381462   |
| H  | 1.67109586  | -0.72998110 | 1.59989017   |
| H  | 3.71931209  | -0.00213492 | 0.86255662   |
| H  | 3.53319766  | -2.18326198 | -0.57581866  |
| H  | 5.48667044  | -1.01788042 | -2.71847440  |
| H  | 2.88605466  | 2.22250350  | -8.48889489  |
| H  | 5.77569073  | 1.60072086  | -5.64511949  |
| H  | 5.74656711  | 1.24868470  | -1.37980259  |
| H  | 6.25257310  | 2.03209534  | -3.45424572  |
| H  | 4.67553634  | 2.30322040  | -7.31606257  |
| Np | -1.86679797 | 2.58058036  | -10.96484055 |
| O  | -4.40183651 | 2.59117387  | -11.04789316 |
| O  | -1.90454338 | 4.31446861  | -11.32283207 |
| O  | -1.80499971 | 0.84309740  | -10.62180215 |
| O  | -0.04275319 | 2.39089921  | -12.72858896 |
| O  | -2.90256775 | 2.93895411  | -8.78945310  |
| O  | -2.85032855 | 2.04759895  | -13.24666209 |
| H  | 0.50352208  | 1.58531864  | -12.76094782 |
| H  | 0.57954995  | 3.14029005  | -12.75039138 |
| H  | -2.94771536 | 2.18348222  | -8.17466830  |
| H  | -2.72300673 | 3.75615048  | -8.19707372  |
| H  | -4.76779959 | 2.92827128  | -10.21025897 |
| H  | -4.85772240 | 3.05466401  | -11.77173157 |
| H  | -3.09799077 | 1.13066712  | -13.46168337 |
| H  | -2.45692205 | 2.42684788  | -14.05230477 |
| O  | 0.14864776  | 2.92189591  | -9.82468320  |
| H  | 0.19310856  | 3.75755608  | -9.24654646  |
| H  | 0.80243598  | 2.31450107  | -9.34436180  |

$C_{60}(OH)_{24}/NpO_2(H_2O)_4^{2+}$  ( $C_{60}(OH)_{24}/Np(VI)$ -IS1)

|   |             |             |             |
|---|-------------|-------------|-------------|
| C | -0.32759015 | 0.32507909  | -0.42158519 |
| C | 1.07718105  | 0.29068388  | -0.27781872 |
| C | 1.80569473  | 1.47123858  | -0.11298393 |
| C | 1.12988026  | 2.73839437  | -0.13064299 |
| C | -0.25855479 | 2.75557677  | -0.32470316 |
| C | -1.00496081 | 1.54464571  | -0.41193740 |
| C | -0.89504807 | -0.98790214 | -0.88080636 |
| C | 0.45722049  | -1.86802668 | -1.35305947 |
| C | 1.70660221  | -0.98395053 | -0.82766287 |
| C | 2.74638003  | -0.59755981 | -1.84217623 |
| C | 3.03861711  | 1.64751193  | -0.85770135 |
| C | 1.93899825  | 3.68855822  | -0.84340325 |
| C | 1.33408583  | 4.60436862  | -1.70587139 |
| C | -0.06975538 | 4.63306886  | -1.85548381 |
| C | -0.87572090 | 3.74333401  | -1.14888421 |
| C | -2.32147443 | 3.40633968  | -1.41247984 |
| C | -2.41449826 | 1.80772627  | -0.88317373 |
| C | -2.87874970 | 0.70108952  | -1.90684679 |
| C | -2.06298708 | -0.77267848 | -1.92227576 |
| C | 0.58886719  | -2.38122622 | -2.88205734 |
| C | -0.58275022 | -1.86515127 | -3.88413373 |
| C | -1.56778863 | -0.85761032 | -3.33313484 |
| C | -2.09933583 | 0.14007706  | -4.12478840 |
| C | -2.67989813 | 1.18766317  | -3.31705906 |
| C | -2.60056108 | 2.48869052  | -3.74358296 |
| C | -2.72511527 | 3.73417928  | -2.90598742 |
| C | -1.73614754 | 4.82113723  | -3.76297175 |
| C | -0.51093830 | 5.47632659  | -3.01410881 |
| C | 3.12062292  | 2.97758689  | -1.29362656 |
| C | 2.38935720  | 4.36245468  | -5.87451179 |
| C | 3.54480350  | 4.14552188  | -4.83411200 |
| C | 4.35288353  | 2.67874824  | -4.84804775 |
| C | 3.92617793  | 1.58917809  | -5.89461407 |
| C | 2.50415944  | 1.83537893  | -6.33252410 |
| C | 0.41553137  | 3.08198242  | -6.45366031 |
| C | -0.21416800 | 4.35231455  | -5.91596064 |
| C | 1.03160122  | 5.24206335  | -5.38904421 |
| C | 0.90541931  | 5.76139112  | -3.86660218 |
| C | 2.07697301  | 5.23777644  | -2.87528460 |
| C | 3.03980031  | 4.22515489  | -3.42752032 |
| C | 4.15037046  | 2.18885369  | -3.44575416 |
| C | 4.07219891  | 0.89101721  | -3.01935437 |

|   |             |             |             |
|---|-------------|-------------|-------------|
| C | 4.17434292  | -0.35604969 | -3.84738944 |
| C | 3.83428617  | -0.05984443 | -5.35372893 |
| C | 2.38001145  | -0.37226220 | -5.61279925 |
| C | 1.76302530  | 0.62368878  | -6.42437191 |
| C | 0.37150483  | 0.63850592  | -6.61635103 |
| C | -0.31488363 | 1.90479019  | -6.63293129 |
| C | -1.29120934 | 4.00369806  | -4.93403561 |
| C | -1.93466833 | 2.77876586  | -4.98808912 |
| C | -1.55329084 | 1.73203303  | -5.88738070 |
| C | -1.61843623 | 0.40660731  | -5.44609227 |
| C | -0.43619087 | -0.30737850 | -5.90603765 |
| C | 0.16689026  | -1.22006082 | -5.04416086 |
| C | 1.57176290  | -1.26339211 | -4.90994037 |
| C | 2.01365750  | -2.10333653 | -3.74901254 |
| C | 3.21218575  | -1.42825264 | -2.99772532 |
| C | 3.56801750  | 3.23771685  | -2.62903893 |
| C | 3.41167077  | 0.60126032  | -1.76067630 |
| C | 1.82312512  | 3.05104480  | -6.32458515 |
| O | 2.37212503  | -1.72707014 | 0.22152386  |
| O | 0.41748459  | -3.00629905 | -0.53731120 |
| O | 0.46236254  | -3.76834094 | -2.84085213 |
| O | -1.47299386 | -1.67939159 | 0.20500955  |
| O | -3.02732425 | -1.77142745 | -1.69308843 |
| O | -1.35694533 | -2.96401653 | -4.30480438 |
| O | -4.22562015 | 0.41337741  | -1.62199740 |
| O | -3.29795409 | 1.79514405  | 0.20940242  |
| O | 5.50905199  | -0.90590570 | -3.80255807 |
| O | 2.82872743  | 6.39873521  | -2.44188780 |
| O | 4.49880241  | 5.18594613  | -5.07715499 |
| O | 1.01959466  | 7.15788620  | -3.90184477 |
| O | -0.96043277 | 6.73590400  | -2.54540372 |
| O | 1.04830411  | 6.38478775  | -6.21375412 |
| O | -0.80536925 | 5.13685524  | -7.00879372 |
| O | -2.54371780 | 5.90692170  | -4.18848825 |
| O | -4.03048548 | 4.19782310  | -2.92675373 |
| O | -3.16432606 | 4.16185859  | -0.57859839 |
| O | 2.45177562  | -3.36194549 | -4.21997039 |
| O | 4.03303709  | -2.49260505 | -2.50694478 |
| O | 4.61438806  | -0.84600724 | -6.19002967 |
| O | 4.73774592  | 1.65550197  | -7.02021864 |
| O | 5.74072584  | 2.99611850  | -5.09401940 |
| O | 2.93407690  | 5.06812568  | -6.97970619 |
| H | -0.98135327 | -3.72333915 | -3.78412387 |
| H | 1.18557597  | -4.10158827 | -3.44395547 |

|    |             |             |              |
|----|-------------|-------------|--------------|
| H  | 1.21159998  | -2.92301475 | 0.05897578   |
| H  | 3.20011098  | -2.08521763 | -0.15596508  |
| H  | -0.88221110 | -2.48665687 | 0.29514434   |
| H  | -2.79015597 | -2.09175672 | -0.77332593  |
| H  | -4.25955008 | -0.58559402 | -1.61250949  |
| H  | 3.70808656  | 6.35276738  | -2.86485266  |
| H  | -0.29041726 | 7.37246914  | -2.93215259  |
| H  | 1.82432851  | 7.35510251  | -3.34237853  |
| H  | -2.28017134 | 6.63692199  | -3.55228926  |
| H  | -4.19385176 | 4.48895094  | -1.99368576  |
| H  | -3.50766235 | 3.49771750  | 0.08286005   |
| H  | -4.06308597 | 1.24473655  | -0.12298413  |
| H  | 3.25367677  | -3.55778102 | -3.66804644  |
| H  | 4.95131599  | -2.25298660 | -2.79064136  |
| H  | 6.07889614  | -0.31287930 | -3.28056948  |
| H  | 5.44485351  | -1.03821416 | -5.70886957  |
| H  | 5.62968065  | 1.91682697  | -6.71591355  |
| H  | -0.17947654 | 5.95383479  | -7.00385400  |
| H  | 3.80361291  | 5.40728943  | -6.62472988  |
| H  | 6.25246891  | 2.80128120  | -4.28797408  |
| H  | 5.36983184  | 4.71349888  | -5.12984369  |
| H  | 1.86368045  | 6.24026689  | -6.79119728  |
| Np | -2.77821365 | 4.99519670  | -8.36180310  |
| O  | -3.59720366 | 4.29229259  | -10.64431751 |
| O  | -3.38589071 | 3.53040197  | -7.57186107  |
| O  | -2.16398452 | 6.43738303  | -9.19150821  |
| O  | -3.47156441 | 6.37937161  | -6.51248087  |
| O  | -1.03463278 | 3.47939712  | -9.40216547  |
| O  | -5.18789884 | 5.63155878  | -8.69331077  |
| H  | -3.38112651 | 7.34245048  | -6.61595949  |
| H  | -3.17323506 | 6.15846083  | -5.55371486  |
| H  | -0.21293807 | 3.84539135  | -9.77425794  |
| H  | -0.75476277 | 2.76575823  | -8.79013656  |
| H  | -3.17908828 | 4.58523943  | -11.47253958 |
| H  | -3.96112633 | 3.40494917  | -10.81048929 |
| H  | -5.55854253 | 6.20376868  | -9.38623440  |
| H  | -5.80509780 | 5.64238885  | -7.94104021  |

$C_{60}(OH)_{24}/NpO_2(H_2O)_3^{2+}$  ( $C_{60}(OH)_{24}/Np(VI)$ -IS2)

|   |             |            |             |
|---|-------------|------------|-------------|
| C | -0.44958078 | 0.39202384 | -0.50192521 |
| C | 0.94924867  | 0.36096642 | -0.30130573 |
| C | 1.66867419  | 1.54475010 | -0.12978000 |
| C | 0.99416670  | 2.81112062 | -0.19563602 |
| C | -0.38557292 | 2.82553434 | -0.44310806 |

|   |             |             |             |
|---|-------------|-------------|-------------|
| C | -1.12568244 | 1.61037069  | -0.54046973 |
| C | -0.99730399 | -0.93162466 | -0.95544809 |
| C | 0.37317516  | -1.81882384 | -1.35866792 |
| C | 1.60078218  | -0.92384908 | -0.80084217 |
| C | 2.67909967  | -0.55592898 | -1.78135674 |
| C | 2.93069771  | 1.70797537  | -0.82966331 |
| C | 1.83147091  | 3.74880556  | -0.89234912 |
| C | 1.26343586  | 4.65759400  | -1.78553638 |
| C | -0.13740611 | 4.69413919  | -1.97961251 |
| C | -0.97019124 | 3.80716817  | -1.29816680 |
| C | -2.40172762 | 3.45309436  | -1.62368091 |
| C | -2.51480090 | 1.85976910  | -1.07027002 |
| C | -2.94309467 | 0.72975314  | -2.08608782 |
| C | -2.12630759 | -0.74165776 | -2.04376013 |
| C | 0.56479228  | -2.35949914 | -2.87167281 |
| C | -0.56714825 | -1.86369125 | -3.92602853 |
| C | -1.57697284 | -0.85066961 | -3.43351139 |
| C | -2.07967889 | 0.12906036  | -4.26856093 |
| C | -2.69170133 | 1.18763595  | -3.49614040 |
| C | -2.59677299 | 2.47993117  | -3.94505389 |
| C | -2.72470350 | 3.75330525  | -3.14330747 |
| C | -1.68497453 | 4.77426288  | -3.96680463 |
| C | -0.52863509 | 5.49267306  | -3.18884719 |
| C | 3.02972551  | 3.02816187  | -1.28521480 |
| C | 2.47732999  | 4.32601824  | -5.92200264 |
| C | 3.58514616  | 4.12745756  | -4.82827111 |
| C | 4.39599419  | 2.66672998  | -4.78516861 |
| C | 4.00948483  | 1.55954481  | -5.82895658 |
| C | 2.60556283  | 1.79645697  | -6.33069988 |
| C | 0.52160204  | 3.04551191  | -6.58716810 |
| C | -0.12095199 | 4.31876656  | -6.05059305 |
| C | 1.10865034  | 5.21383687  | -5.50059761 |
| C | 0.92193737  | 5.75997540  | -3.99042535 |
| C | 2.05034759  | 5.25896775  | -2.94511812 |
| C | 3.02502678  | 4.23074247  | -3.44334405 |
| C | 4.14150693  | 2.20066200  | -3.38241925 |
| C | 4.04974459  | 0.91144427  | -2.93462834 |
| C | 4.18240647  | -0.34963386 | -3.73672468 |
| C | 3.89677660  | -0.07914367 | -5.25974328 |
| C | 2.45335962  | -0.39537883 | -5.56677130 |
| C | 1.86925325  | 0.58287210  | -6.42139119 |
| C | 0.48581298  | 0.59394217  | -6.66695911 |
| C | -0.19569021 | 1.85623015  | -6.74184788 |
| C | -1.17446963 | 3.92308802  | -5.06834281 |

|   |             |             |             |
|---|-------------|-------------|-------------|
| C | -1.85674166 | 2.72543496  | -5.15647114 |
| C | -1.46080515 | 1.68455333  | -6.04541442 |
| C | -1.54704810 | 0.36523720  | -5.57625204 |
| C | -0.34582827 | -0.34827070 | -5.97342412 |
| C | 0.22372921  | -1.24292075 | -5.07134491 |
| C | 1.62142270  | -1.27710901 | -4.87907930 |
| C | 2.02025052  | -2.09588502 | -3.68808997 |
| C | 3.18865643  | -1.40707222 | -2.90376489 |
| C | 3.52733920  | 3.26272234  | -2.60765132 |
| C | 3.34028479  | 0.64451546  | -1.69753576 |
| C | 1.92235932  | 3.01095388  | -6.38244194 |
| O | 2.22183083  | -1.64592461 | 0.28848267  |
| O | 0.30016797  | -2.94112816 | -0.52397125 |
| O | 0.43543626  | -3.74531069 | -2.81042759 |
| O | -1.61422545 | -1.60249217 | 0.12105832  |
| O | -3.09793407 | -1.73467711 | -1.82933019 |
| O | -1.34044798 | -2.96688609 | -4.33711745 |
| O | -4.29874742 | 0.44741299  | -1.84191728 |
| O | -3.44448304 | 1.87581949  | -0.01591076 |
| O | 5.51329666  | -0.89909783 | -3.63225543 |
| O | 2.79574479  | 6.42450200  | -2.51528257 |
| O | 4.54429785  | 5.17102088  | -5.03530069 |
| O | 1.02892946  | 7.15646398  | -4.03992565 |
| O | -1.03969806 | 6.76649511  | -2.83497312 |
| O | 1.15439223  | 6.33909722  | -6.33858040 |
| O | -0.79238849 | 5.13180239  | -7.05918432 |
| O | -2.43754998 | 5.83198530  | -4.57051087 |
| O | -4.03367305 | 4.27099753  | -3.19672404 |
| O | -3.30569369 | 4.20885047  | -0.85151826 |
| O | 2.47469467  | -3.36332020 | -4.11773044 |
| O | 3.99060445  | -2.46005915 | -2.36168501 |
| O | 4.70281557  | -0.88336116 | -6.05272646 |
| O | 4.86706336  | 1.60226833  | -6.91965300 |
| O | 5.79112584  | 2.98431395  | -4.98242300 |
| O | 3.06995335  | 5.01188862  | -7.01193768 |
| H | -0.98283504 | -3.71648021 | -3.78834709 |
| H | 1.18138734  | -4.08881794 | -3.38065770 |
| H | 1.07291391  | -2.84939264 | 0.09893553  |
| H | 3.06874410  | -2.00438242 | -0.04434280 |
| H | -1.02512486 | -2.40731186 | 0.24769184  |
| H | -2.89175280 | -2.03953621 | -0.89634376 |
| H | -4.33209548 | -0.55239636 | -1.81429368 |
| H | 3.68283402  | 6.37021511  | -2.92229273 |
| H | -0.32540998 | 7.39072060  | -3.16946717 |

|    |             |             |             |
|----|-------------|-------------|-------------|
| H  | 1.81809231  | 7.36842612  | -3.46400652 |
| H  | -2.18177865 | 6.63277874  | -4.00545123 |
| H  | -4.22057872 | 4.49500617  | -2.23830170 |
| H  | -3.66524876 | 3.54459957  | -0.19255910 |
| H  | -4.19052425 | 1.30570839  | -0.36147728 |
| H  | 3.25624439  | -3.54891462 | -3.53418516 |
| H  | 4.91856295  | -2.22577132 | -2.61841291 |
| H  | 6.06582089  | -0.29668511 | -3.10252231 |
| H  | 5.52183529  | -1.05856792 | -5.54676336 |
| H  | 5.74441740  | 1.87939691  | -6.58865298 |
| H  | -0.14384036 | 5.91266701  | -7.12497511 |
| H  | 3.91435323  | 5.37414701  | -6.62603756 |
| H  | 6.27537184  | 2.79710733  | -4.15797191 |
| H  | 5.41853228  | 4.70189280  | -5.05284713 |
| H  | 1.97233623  | 6.17543528  | -6.90516590 |
| Np | -3.26198270 | 5.73858624  | -6.91208369 |
| O  | -5.38782904 | 6.24561016  | -8.13262796 |
| O  | -3.63597423 | 4.00994474  | -7.09087589 |
| O  | -2.96297592 | 7.48910361  | -6.84017666 |
| O  | -2.62861461 | 5.91227109  | -9.32344285 |
| O  | -5.11329615 | 5.67612095  | -5.24113237 |
| H  | -2.45214838 | 6.72665188  | -9.82423355 |
| H  | -2.60844789 | 5.16994816  | -9.95132346 |
| H  | -5.76048817 | 7.12951613  | -8.29213312 |
| H  | -6.12373648 | 5.60932540  | -8.16000018 |
| H  | -5.42887084 | 6.50509514  | -4.84269812 |
| H  | -4.79076458 | 5.11223908  | -4.47486351 |

$C_{60}(OH)_{24}/PuO_2(H_2O)_5^{1+}$  ( $C_{60}(OH)_{24}/Pu(V)$ -OS)

|   |             |            |             |
|---|-------------|------------|-------------|
| C | -1.96065117 | 3.53395602 | -1.51452159 |
| C | -0.91545237 | 3.36388712 | -0.57875559 |
| C | 0.24778893  | 4.13479151 | -0.66471381 |
| C | 0.40196707  | 5.08367884 | -1.73292065 |
| C | -0.62737233 | 5.20484638 | -2.67631833 |
| C | -1.84341094 | 4.47392209 | -2.53725589 |
| C | -2.97898996 | 2.43165208 | -1.45189806 |
| C | -2.24883270 | 1.26203884 | -0.49231021 |
| C | -0.94316911 | 2.00514955 | 0.10722861  |
| C | 0.38368190  | 1.33979296 | -0.11106251 |
| C | 1.53662338  | 3.49233519 | -0.48891015 |
| C | 1.76264181  | 5.04840716 | -2.19615625 |
| C | 2.03499941  | 5.13941354 | -3.56391850 |
| C | 0.98430171  | 5.30013099 | -4.49433657 |
| C | -0.33710723 | 5.37540091 | -4.06275680 |

|   |             |             |             |
|---|-------------|-------------|-------------|
| C | -1.57943527 | 5.21093766  | -4.89818410 |
| C | -2.67036989 | 4.55142550  | -3.79591583 |
| C | -3.31828219 | 3.15640824  | -4.12843155 |
| C | -3.47325112 | 2.02358397  | -2.89090735 |
| C | -1.97211875 | -0.21650890 | -1.08996839 |
| C | -2.32992471 | -0.40483196 | -2.66680162 |
| C | -2.72025018 | 0.84558617  | -3.42741778 |
| C | -2.35697671 | 1.02819584  | -4.73923807 |
| C | -2.47641614 | 2.42000371  | -5.12792615 |
| C | -1.59459504 | 2.95573097  | -6.02517415 |
| C | -1.26370280 | 4.41188806  | -6.22000193 |
| C | 0.33793676  | 4.33578821  | -6.75903240 |
| C | 1.42967525  | 5.09470238  | -5.91166634 |
| C | 2.44627554  | 4.04134833  | -1.40756461 |
| C | 3.97177533  | 1.75044392  | -5.39755717 |
| C | 4.44747455  | 2.16123805  | -3.96239635 |
| C | 4.30321397  | 1.03740538  | -2.73273053 |
| C | 3.69641163  | -0.37279842 | -3.05890544 |
| C | 2.84142774  | -0.27708122 | -4.29715343 |
| C | 1.89597314  | 0.83798528  | -6.24588111 |
| C | 1.93542451  | 2.17201514  | -6.97462092 |
| C | 3.23491250  | 2.92871412  | -6.36623304 |
| C | 2.95293224  | 4.40303716  | -5.76063803 |
| C | 3.30055417  | 4.56660755  | -4.18639295 |
| C | 3.67198396  | 3.32402444  | -3.43212675 |
| C | 3.46588081  | 1.76942727  | -1.72775529 |
| C | 2.58013801  | 1.23462350  | -0.83196705 |
| C | 2.23331859  | -0.21158863 | -0.63903495 |
| C | 2.57180165  | -1.05159958 | -1.92126177 |
| C | 1.33460387  | -1.18683247 | -2.77404411 |
| C | 1.62875871  | -1.01141589 | -4.15701223 |
| C | 0.59806022  | -0.88747521 | -5.09984696 |
| C | 0.74432133  | 0.06139225  | -6.16732367 |
| C | 0.60199503  | 2.85745460  | -6.79253805 |
| C | -0.53961814 | 2.12505068  | -6.56815417 |
| C | -0.54509638 | 0.70623875  | -6.34897224 |
| C | -1.44560792 | 0.16197326  | -5.42997570 |
| C | -0.76148465 | -0.85211893 | -4.64324621 |
| C | -1.03752761 | -0.93592741 | -3.28115838 |
| C | 0.00936597  | -1.11918835 | -2.35038328 |
| C | -0.43759847 | -0.91260361 | -0.93610310 |
| C | 0.64699582  | -0.13205967 | -0.12062296 |
| C | 3.33115186  | 3.16202278  | -2.10897797 |
| C | 1.53148281  | 2.07576020  | -0.28933395 |



|   |             |             |             |
|---|-------------|-------------|-------------|
| C | 2.95152905  | 0.65739220  | -5.32378855 |
| O | -1.12627641 | 2.14786551  | 1.54356080  |
| O | -3.13654005 | 1.11446549  | 0.58717312  |
| O | -2.82131532 | -1.08033563 | -0.39432497 |
| O | -4.12763923 | 2.87428077  | -0.75077972 |
| O | -4.85427692 | 1.73061752  | -2.79538887 |
| O | -3.37963765 | -1.33783448 | -2.79452481 |
| O | -4.62673171 | 3.40345563  | -4.60917312 |
| O | -3.71003764 | 5.49295734  | -3.64493412 |
| O | 2.98610675  | -0.77161379 | 0.46696766  |
| O | 4.40929994  | 5.50185310  | -4.07089902 |
| O | 5.83337070  | 2.52668338  | -4.07838056 |
| O | 3.80227740  | 5.29335034  | -6.43842645 |
| O | 1.61611683  | 6.35604687  | -6.53067979 |
| O | 4.11972401  | 3.09755008  | -7.44053177 |
| O | 2.17433290  | 1.95703445  | -8.37717658 |
| O | 0.40646002  | 4.87851644  | -8.06109132 |
| O | -2.06086332 | 4.97960103  | -7.24206817 |
| O | -2.10381328 | 6.46762248  | -5.27777016 |
| O | -0.62638199 | -2.16917215 | -0.30499958 |
| O | 0.58326468  | -0.62622781 | 1.22778834  |
| O | 3.00994855  | -2.32194410 | -1.55882547 |
| O | 4.71728370  | -1.29037871 | -3.29014490 |
| O | 5.64527565  | 0.83186957  | -2.22136964 |
| O | 5.11535873  | 1.30845822  | -6.11431995 |
| H | -3.62244374 | -1.53808637 | -1.85509830 |
| H | -2.23744508 | -1.86059185 | -0.17475928 |
| H | -2.62888522 | 1.45672572  | 1.37387246  |
| H | -0.55280901 | 1.47460206  | 1.96150506  |
| H | -4.11395784 | 2.29259085  | 0.06873406  |
| H | -5.09518243 | 2.14785680  | -1.91673343 |
| H | -5.18135460 | 2.77255629  | -4.05817506 |
| H | 5.19761995  | 4.96823427  | -3.84787483 |
| H | 2.60046688  | 6.35949759  | -6.72124420 |
| H | 4.37484166  | 5.68171420  | -5.71973750 |
| H | 0.80741745  | 5.77960051  | -7.91469627 |
| H | -2.30756248 | 5.87304462  | -6.87228913 |
| H | -2.92992276 | 6.54890948  | -4.71991011 |
| H | -4.49820346 | 5.00433281  | -4.01997060 |
| H | -0.25633230 | -2.02882572 | 0.60498851  |
| H | 1.52501776  | -0.83652799 | 1.45203529  |
| H | 3.57889235  | -0.07837448 | 0.80801409  |
| H | 3.45684241  | -2.22732532 | -0.69447774 |
| H | 5.46380132  | -1.02895776 | -2.71611875 |

|    |             |            |              |
|----|-------------|------------|--------------|
| H  | 3.07227017  | 2.38365009 | -8.50206125  |
| H  | 5.87234294  | 1.66232208 | -5.57548938  |
| H  | 5.68141935  | 1.20235165 | -1.32136757  |
| H  | 6.27628833  | 2.01596570 | -3.35323533  |
| H  | 4.82871789  | 2.40932651 | -7.26546357  |
| Pu | -2.07269222 | 2.36884118 | -10.37955938 |
| O  | -4.63153733 | 2.02273223 | -10.54589448 |
| O  | -2.27155389 | 4.03614418 | -10.98239653 |
| O  | -1.87523031 | 0.70463116 | -9.75629768  |
| O  | -0.27100915 | 1.87771212 | -12.22266501 |
| O  | -3.43697115 | 3.06799229 | -8.34692629  |
| O  | -2.92991741 | 1.63642097 | -12.66203813 |
| H  | 0.07332757  | 0.97436627 | -12.11028382 |
| H  | 0.34435638  | 2.45327392 | -11.71008371 |
| H  | -3.44420043 | 2.47814487 | -7.56929545  |
| H  | -3.06490115 | 3.92767096 | -7.97041440  |
| H  | -4.88276725 | 1.09823922 | -10.37666455 |
| H  | -4.83945560 | 2.51116486 | -9.72232150  |
| H  | -2.19769976 | 1.91073652 | -13.24571703 |
| H  | -3.68547545 | 2.21024217 | -12.87965498 |
| O  | 0.29693320  | 3.01741870 | -9.89726356  |
| H  | 0.32744049  | 3.88759763 | -9.40734128  |
| H  | 0.96187197  | 2.47809960 | -9.37057959  |

$C_{60}(OH)_{24}/PuO_2(H_2O)_4^{1+}$  ( $C_{60}(OH)_{24}/Pu(V)$ -IS1)

|   |             |             |             |
|---|-------------|-------------|-------------|
| C | -0.35647427 | 0.31394562  | -0.46835899 |
| C | 1.04532960  | 0.27040136  | -0.30559058 |
| C | 1.77841645  | 1.44661221  | -0.11943680 |
| C | 1.10819206  | 2.71758658  | -0.13147057 |
| C | -0.27812680 | 2.74258842  | -0.34221094 |
| C | -1.02899167 | 1.53634718  | -0.45173376 |
| C | -0.92537907 | -0.99059437 | -0.94844480 |
| C | 0.42625140  | -1.87252543 | -1.41396131 |
| C | 1.67214354  | -0.99939972 | -0.86597841 |
| C | 2.72401002  | -0.60640402 | -1.86205256 |
| C | 3.02125079  | 1.62505491  | -0.84509946 |
| C | 1.92928507  | 3.67237521  | -0.82488743 |
| C | 1.33664089  | 4.60095252  | -1.68522357 |
| C | -0.06443163 | 4.63488377  | -1.85174110 |
| C | -0.88226601 | 3.74118223  | -1.16301322 |
| C | -2.32598921 | 3.41249521  | -1.44898030 |
| C | -2.43028738 | 1.81072874  | -0.93932796 |
| C | -2.88601540 | 0.71686670  | -1.97914987 |
| C | -2.07445847 | -0.76354405 | -2.00030661 |

|   |             |             |             |
|---|-------------|-------------|-------------|
| C | 0.57371292  | -2.37609634 | -2.94538125 |
| C | -0.58732680 | -1.85446092 | -3.96066090 |
| C | -1.56810461 | -0.84157374 | -3.40688474 |
| C | -2.07914032 | 0.16747181  | -4.18515270 |
| C | -2.67161583 | 1.21860011  | -3.37934014 |
| C | -2.58206980 | 2.51812193  | -3.78693859 |
| C | -2.71118081 | 3.76071731  | -2.94144505 |
| C | -1.70098548 | 4.84632191  | -3.77853818 |
| C | -0.49184829 | 5.48999205  | -3.00659591 |
| C | 3.11232685  | 2.96119599  | -1.26799402 |
| C | 2.44038306  | 4.39264623  | -5.84865562 |
| C | 3.57488459  | 4.15788964  | -4.79318679 |
| C | 4.37724488  | 2.69117731  | -4.81258928 |
| C | 3.96596741  | 1.61314642  | -5.87610095 |
| C | 2.55244910  | 1.87018227  | -6.33353184 |
| C | 0.46951448  | 3.12667739  | -6.45977380 |
| C | -0.16337444 | 4.39851639  | -5.92322171 |
| C | 1.07828432  | 5.27801331  | -5.37480190 |
| C | 0.93444875  | 5.77748814  | -3.84306598 |
| C | 2.09036006  | 5.23741508  | -2.84538535 |
| C | 3.05158929  | 4.22362201  | -3.39403928 |
| C | 4.15786800  | 2.18887082  | -3.41780768 |
| C | 4.07063819  | 0.88734345  | -3.00492727 |
| C | 4.17531091  | -0.34993908 | -3.84550135 |
| C | 3.85967866  | -0.03979981 | -5.35241576 |
| C | 2.40918044  | -0.34522895 | -5.63369857 |
| C | 1.80754987  | 0.66087868  | -6.44592057 |
| C | 0.42001665  | 0.68440169  | -6.65164153 |
| C | -0.26148235 | 1.95398334  | -6.65857507 |
| C | -1.23581344 | 4.03111648  | -4.94230167 |
| C | -1.88805012 | 2.82304057  | -5.01728504 |
| C | -1.50550285 | 1.77774756  | -5.92214937 |
| C | -1.58843196 | 0.45190122  | -5.50287929 |
| C | -0.40205977 | -0.26201764 | -5.95553969 |
| C | 0.18397909  | -1.18526143 | -5.09480785 |
| C | 1.58856130  | -1.23657830 | -4.94782093 |
| C | 2.01154405  | -2.08968268 | -3.79152637 |
| C | 3.20025931  | -1.42558412 | -3.01928395 |
| C | 3.57241820  | 3.23132068  | -2.59655345 |
| C | 3.39570151  | 0.58789566  | -1.75692914 |
| C | 1.87616610  | 3.08764192  | -6.31866267 |
| O | 2.33415548  | -1.76143328 | 0.18077413  |
| O | 0.37516105  | -3.01975563 | -0.60355991 |
| O | 0.46051574  | -3.76795232 | -2.90713174 |

|   |             |             |             |
|---|-------------|-------------|-------------|
| O | -1.51118975 | -1.68687124 | 0.13719821  |
| O | -3.05327224 | -1.75975121 | -1.77583417 |
| O | -1.31590656 | -2.96402312 | -4.43794923 |
| O | -4.23795713 | 0.42333231  | -1.69848276 |
| O | -3.33013780 | 1.78532976  | 0.14496670  |
| O | 5.51687695  | -0.89771547 | -3.78060301 |
| O | 2.86356146  | 6.38519101  | -2.39708309 |
| O | 4.54187314  | 5.20220995  | -4.99654527 |
| O | 1.05728906  | 7.17707927  | -3.85702196 |
| O | -0.93649158 | 6.74603096  | -2.51706019 |
| O | 1.11988245  | 6.43327427  | -6.17513312 |
| O | -0.75239416 | 5.16399934  | -7.01607743 |
| O | -2.48649964 | 5.93642548  | -4.23185029 |
| O | -4.01255956 | 4.24617770  | -2.96625652 |
| O | -3.16949179 | 4.16136646  | -0.60249036 |
| O | 2.46011653  | -3.34787883 | -4.26832018 |
| O | 4.01999764  | -2.49745641 | -2.52505696 |
| O | 4.65777461  | -0.82415458 | -6.18000944 |
| O | 4.80791286  | 1.68736813  | -6.98300458 |
| O | 5.77722097  | 3.00564896  | -5.02580581 |
| O | 3.01309316  | 5.10051564  | -6.94066501 |
| H | -0.93929993 | -3.72328115 | -3.92587798 |
| H | 1.19122749  | -4.08412325 | -3.50872221 |
| H | 1.16668432  | -2.93719195 | -0.00460734 |
| H | 3.15224474  | -2.12206754 | -0.21571010 |
| H | -0.92253604 | -2.49584855 | 0.21603904  |
| H | -2.82506842 | -2.07576195 | -0.85471570 |
| H | -4.25558529 | -0.57731484 | -1.69271275 |
| H | 3.72115667  | 6.34167898  | -2.86365133 |
| H | -0.26925879 | 7.38101545  | -2.90739749 |
| H | 1.85259669  | 7.35892007  | -3.28335569 |
| H | -2.27950849 | 6.65182727  | -3.57024638 |
| H | -4.17354445 | 4.53205249  | -2.03403245 |
| H | -3.52940314 | 3.47732928  | 0.02915421  |
| H | -4.08263708 | 1.23235774  | -0.21895350 |
| H | 3.25093286  | -3.54196133 | -3.70144562 |
| H | 4.93717385  | -2.24731372 | -2.80288132 |
| H | 6.05757412  | -0.30518045 | -3.22841524 |
| H | 5.48898435  | -0.98756905 | -5.69153852 |
| H | 5.68854985  | 1.94623757  | -6.64725460 |
| H | -0.16799729 | 5.98485181  | -7.04083559 |
| H | 3.86588915  | 5.44684569  | -6.56164656 |
| H | 6.25816081  | 2.79419650  | -4.20558176 |
| H | 5.40713258  | 4.72020775  | -5.04249933 |

|    |             |            |              |
|----|-------------|------------|--------------|
| H  | 1.92325845  | 6.28375217 | -6.75755050  |
| Pu | -2.85059818 | 4.95086700 | -8.30031523  |
| O  | -3.80271894 | 3.92497846 | -10.44238737 |
| O  | -3.40870206 | 3.48031677 | -7.44891615  |
| O  | -2.30503996 | 6.42297822 | -9.16279439  |
| O  | -3.77858464 | 6.38691463 | -6.45464117  |
| O  | -1.18423316 | 3.36056911 | -9.51217054  |
| O  | -5.30225095 | 5.57697352 | -8.69648981  |
| H  | -3.46807900 | 7.30175104 | -6.56686147  |
| H  | -3.42340572 | 6.11246457 | -5.55043621  |
| H  | -0.36532572 | 3.78933588 | -9.81620901  |
| H  | -0.89751453 | 2.70166940 | -8.84610682  |
| H  | -3.15029296 | 3.25360305 | -10.71359936 |
| H  | -4.61484564 | 3.43616306 | -10.22183730 |
| H  | -5.40768373 | 6.35291442 | -9.27367575  |
| H  | -5.57043027 | 5.87063694 | -7.80447698  |

$C_{60}(OH)_{24}/PuO_2(H_2O)_3^{1+}$  ( $C_{60}(OH)_{24}/Pu(V)$ -IS2)

|   |             |             |             |
|---|-------------|-------------|-------------|
| C | -0.47942307 | 0.39476060  | -0.53039823 |
| C | 0.91498086  | 0.36049385  | -0.30708427 |
| C | 1.63497094  | 1.54465308  | -0.12502447 |
| C | 0.96227835  | 2.81239272  | -0.20013993 |
| C | -0.41406853 | 2.82770812  | -0.46758037 |
| C | -1.15427429 | 1.61378420  | -0.57544295 |
| C | -1.02406666 | -0.92646147 | -0.99307841 |
| C | 0.34801042  | -1.81581140 | -1.37789192 |
| C | 1.56782890  | -0.92267542 | -0.80422615 |
| C | 2.65778696  | -0.55397649 | -1.76745854 |
| C | 2.90676480  | 1.70717008  | -0.80407480 |
| C | 1.80901689  | 3.75050175  | -0.88555574 |
| C | 1.25132206  | 4.66062233  | -1.78725145 |
| C | -0.14563862 | 4.69576459  | -2.00208607 |
| C | -0.98755947 | 3.80937099  | -1.33018032 |
| C | -2.41463770 | 3.45463523  | -1.67482605 |
| C | -2.53437753 | 1.86477951  | -1.12625350 |
| C | -2.94864256 | 0.73659238  | -2.14815296 |
| C | -2.13118439 | -0.73860276 | -2.09565426 |
| C | 0.55939526  | -2.36266399 | -2.88685345 |
| C | -0.56192898 | -1.87757124 | -3.96284142 |
| C | -1.56951952 | -0.85448461 | -3.47877850 |
| C | -2.05319908 | 0.12678246  | -4.30856481 |
| C | -2.68229037 | 1.19552824  | -3.55286080 |
| C | -2.57779794 | 2.48179469  | -3.99565295 |
| C | -2.71832389 | 3.75323739  | -3.19538232 |

|   |             |             |             |
|---|-------------|-------------|-------------|
| C | -1.67013618 | 4.78618403  | -4.00694662 |
| C | -0.52394062 | 5.49778892  | -3.21345048 |
| C | 3.01164873  | 3.03026958  | -1.26013564 |
| C | 2.52235082  | 4.32593602  | -5.90824650 |
| C | 3.60838393  | 4.12427824  | -4.79707280 |
| C | 4.41706431  | 2.66525400  | -4.74285285 |
| C | 4.05200863  | 1.55792129  | -5.79254156 |
| C | 2.65807189  | 1.79668866  | -6.31716729 |
| C | 0.57665254  | 3.04527631  | -6.59019298 |
| C | -0.07578801 | 4.32299182  | -6.07529081 |
| C | 1.14531441  | 5.21772393  | -5.51085784 |
| C | 0.93847123  | 5.76052393  | -3.99983742 |
| C | 2.04961306  | 5.25612589  | -2.94038610 |
| C | 3.02800044  | 4.22660470  | -3.42240798 |
| C | 4.14445734  | 2.20063538  | -3.34384280 |
| C | 4.04569753  | 0.91156369  | -2.89732838 |
| C | 4.18666341  | -0.34778771 | -3.69878735 |
| C | 3.92897719  | -0.08000069 | -5.22516101 |
| C | 2.49171665  | -0.39738191 | -5.55423486 |
| C | 1.92160407  | 0.58195244  | -6.41957150 |
| C | 0.54426847  | 0.59505538  | -6.68152691 |
| C | -0.13732532 | 1.85786481  | -6.75770901 |
| C | -1.13375552 | 3.92829548  | -5.09534451 |
| C | -1.81340565 | 2.74150526  | -5.19423991 |
| C | -1.41227531 | 1.68848348  | -6.07584766 |
| C | -1.50920545 | 0.37523255  | -5.61484638 |
| C | -0.30081097 | -0.34085920 | -5.99431288 |
| C | 0.25135487  | -1.23604620 | -5.08389505 |
| C | 1.64875204  | -1.27431269 | -4.87702444 |
| C | 2.02818437  | -2.09333055 | -3.68203763 |
| C | 3.18225928  | -1.40330824 | -2.88151328 |
| C | 3.52315375  | 3.26272994  | -2.57659071 |
| C | 3.32165272  | 0.64518533  | -1.66957096 |
| C | 1.97653426  | 3.01022915  | -6.37400967 |
| O | 2.18762132  | -1.65232527 | 0.29048691  |
| O | 0.26580512  | -2.93879892 | -0.53645252 |
| O | 0.45026430  | -3.75331209 | -2.81148576 |
| O | -1.64919634 | -1.59221692 | 0.08984829  |
| O | -3.11581210 | -1.73024650 | -1.87730221 |
| O | -1.27191189 | -3.00332595 | -4.42905496 |
| O | -4.30912586 | 0.44563165  | -1.90667505 |
| O | -3.48145695 | 1.87384095  | -0.08118509 |
| O | 5.52579071  | -0.88899401 | -3.56460212 |
| O | 2.81085763  | 6.41697968  | -2.50330888 |

|    |             |             |             |
|----|-------------|-------------|-------------|
| O  | 4.57852808  | 5.17132387  | -4.97757744 |
| O  | 1.05535779  | 7.16028891  | -4.04497177 |
| O  | -1.02043382 | 6.77522675  | -2.84529021 |
| O  | 1.21368244  | 6.34882447  | -6.34003399 |
| O  | -0.72015896 | 5.10646812  | -7.11892292 |
| O  | -2.42898425 | 5.83764278  | -4.60503369 |
| O  | -4.03224064 | 4.26493241  | -3.26478645 |
| O  | -3.32241856 | 4.21152611  | -0.90023074 |
| O  | 2.49954462  | -3.36335110 | -4.10355610 |
| O  | 3.98515589  | -2.45623622 | -2.32278020 |
| O  | 4.75932686  | -0.88677468 | -5.99792228 |
| O  | 4.94169867  | 1.60190348  | -6.86266354 |
| O  | 5.82377627  | 2.98128461  | -4.90587780 |
| O  | 3.14212732  | 5.00866446  | -6.98973455 |
| H  | -0.91064725 | -3.74550712 | -3.88212923 |
| H  | 1.20519847  | -4.08210952 | -3.37600073 |
| H  | 1.03546899  | -2.83880730 | 0.08798878  |
| H  | 3.02437538  | -2.01725493 | -0.06084906 |
| H  | -1.05938131 | -2.39562608 | 0.21456652  |
| H  | -2.91865741 | -2.02016735 | -0.94016246 |
| H  | -4.31999710 | -0.55592859 | -1.87053159 |
| H  | 3.68105766  | 6.35792133  | -2.94534449 |
| H  | -0.30554948 | 7.39060194  | -3.18826314 |
| H  | 1.83307212  | 7.36143045  | -3.45322343 |
| H  | -2.17593049 | 6.63892378  | -4.05901992 |
| H  | -4.22512553 | 4.50455709  | -2.31587603 |
| H  | -3.69484449 | 3.53318973  | -0.26364471 |
| H  | -4.21129192 | 1.29573156  | -0.45557634 |
| H  | 3.26773526  | -3.53766557 | -3.50068450 |
| H  | 4.91160261  | -2.20999003 | -2.57277206 |
| H  | 6.04344615  | -0.27765255 | -3.01095890 |
| H  | 5.57505469  | -1.02714462 | -5.47775959 |
| H  | 5.80748381  | 1.87042752  | -6.49793950 |
| H  | -0.09859156 | 5.89388060  | -7.18954601 |
| H  | 3.96945386  | 5.37868914  | -6.58072761 |
| H  | 6.27081872  | 2.79460961  | -4.06096616 |
| H  | 5.44674341  | 4.69218425  | -4.98157902 |
| H  | 2.03048740  | 6.17923201  | -6.89795127 |
| Pu | -3.21457506 | 5.73308762  | -7.01542073 |
| O  | -5.56815391 | 6.20293374  | -7.90545844 |
| O  | -3.61395405 | 3.99594237  | -7.09390247 |
| O  | -2.88259332 | 7.49301562  | -6.99729674 |
| O  | -2.95908967 | 5.73004952  | -9.51053239 |
| O  | -5.12263995 | 5.78727503  | -5.24273481 |

|   |             |            |              |
|---|-------------|------------|--------------|
| H | -2.92106000 | 6.51008192 | -10.08721683 |
| H | -3.30143933 | 4.99149637 | -10.04110867 |
| H | -5.78953654 | 7.14750768 | -7.96988375  |
| H | -6.05512690 | 5.87477366 | -7.12142278  |
| H | -5.11318013 | 6.63540657 | -4.76716183  |
| H | -4.78196337 | 5.13586962 | -4.56075558  |

$C_{60}(OH)_{24}/PuO_2(H_2O)_5^{2+}$  ( $C_{60}(OH)_{24}/Pu(VI)-OS$ )

|   |             |             |             |
|---|-------------|-------------|-------------|
| C | -1.93090464 | 3.54286769  | -1.41506240 |
| C | -0.86475251 | 3.39014251  | -0.49926706 |
| C | 0.29596996  | 4.15508130  | -0.62620212 |
| C | 0.43105002  | 5.07881971  | -1.71811040 |
| C | -0.61642773 | 5.18223332  | -2.64347468 |
| C | -1.82993611 | 4.45618455  | -2.46320504 |
| C | -2.95077303 | 2.44551599  | -1.30281402 |
| C | -2.20231252 | 1.29633276  | -0.33070370 |
| C | -0.88168604 | 2.04937538  | 0.22544608  |
| C | 0.43976688  | 1.37128010  | -0.00446534 |
| C | 1.58647718  | 3.50841847  | -0.46525932 |
| C | 1.78186988  | 5.02723012  | -2.20657995 |
| C | 2.02788526  | 5.08589629  | -3.57863740 |
| C | 0.95991838  | 5.23360786  | -4.49268248 |
| C | -0.35350207 | 5.32165341  | -4.03924975 |
| C | -1.61374772 | 5.14096926  | -4.84710308 |
| C | -2.68492715 | 4.51074203  | -3.70437177 |
| C | -3.34944516 | 3.11160533  | -3.99165946 |
| C | -3.47940907 | 2.00861019  | -2.72687053 |
| C | -1.93832618 | -0.19318466 | -0.90411306 |
| C | -2.32020374 | -0.40416268 | -2.46836286 |
| C | -2.73168763 | 0.82151369  | -3.25148407 |
| C | -2.39744701 | 0.96862413  | -4.58594240 |
| C | -2.52981916 | 2.34750285  | -4.99391952 |
| C | -1.65877670 | 2.85923026  | -5.92336783 |
| C | -1.32359538 | 4.30773860  | -6.15565701 |
| C | 0.26194119  | 4.21703432  | -6.71888323 |
| C | 1.38018549  | 4.99149469  | -5.91128966 |
| C | 2.47720132  | 4.03183775  | -1.41041601 |
| C | 3.91973843  | 1.65044365  | -5.37539090 |
| C | 4.42925615  | 2.09030159  | -3.95846945 |
| C | 4.30783216  | 0.99344597  | -2.69984317 |
| C | 3.68401834  | -0.41976418 | -2.98479993 |
| C | 2.80118368  | -0.34665805 | -4.20633429 |
| C | 1.82607350  | 0.72356334  | -6.16586550 |
| C | 1.85161054  | 2.04503412  | -6.91920427 |



|   |             |             |             |
|---|-------------|-------------|-------------|
| C | 3.16765769  | 2.80999911  | -6.35243209 |
| C | 2.90372060  | 4.29799385  | -5.77454207 |
| C | 3.28352839  | 4.49684510  | -4.21078608 |
| C | 3.66670032  | 3.26760654  | -3.43678433 |
| C | 3.49089316  | 1.74954835  | -1.69436285 |
| C | 2.62191151  | 1.23850361  | -0.76914736 |
| C | 2.27436973  | -0.20215291 | -0.53353222 |
| C | 2.58063904  | -1.06934793 | -1.80808713 |
| C | 1.32542404  | -1.21583308 | -2.63353722 |
| C | 1.59031522  | -1.07059191 | -4.02405953 |
| C | 0.53862669  | -0.96423877 | -4.95090568 |
| C | 0.67194610  | -0.04669517 | -6.04623215 |
| C | 0.52312365  | 2.73860637  | -6.72476770 |
| C | -0.62172812 | 2.00959249  | -6.45936709 |
| C | -0.61527794 | 0.60033768  | -6.21380608 |
| C | -1.50543035 | 0.07780978  | -5.25878143 |
| C | -0.81069794 | -0.92169561 | -4.46719497 |
| C | -1.05555171 | -0.97604674 | -3.09639946 |
| C | 0.00792789  | -1.13730689 | -2.18316091 |
| C | -0.40832158 | -0.89631041 | -0.76327911 |
| C | 0.69692924  | -0.10373256 | 0.01519642  |
| C | 3.34943543  | 3.13365690  | -2.10660213 |
| C | 1.58457666  | 2.09610055  | -0.22754846 |
| C | 2.89556816  | 0.56326403  | -5.25929944 |
| O | -1.04209912 | 2.23431087  | 1.65237459  |
| O | -3.06764008 | 1.17196003  | 0.76362627  |
| O | -2.78745643 | -1.04139327 | -0.19601521 |
| O | -4.08632992 | 2.89839565  | -0.59800614 |
| O | -4.84778270 | 1.70588930  | -2.59908867 |
| O | -3.41897399 | -1.28131853 | -2.56818988 |
| O | -4.65981512 | 3.35477059  | -4.44993876 |
| O | -3.70938250 | 5.46253175  | -3.55199315 |
| O | 3.03726500  | -0.75110806 | 0.56262288  |
| O | 4.38647562  | 5.43351938  | -4.14268562 |
| O | 5.80728740  | 2.44638276  | -4.11732286 |
| O | 3.73787074  | 5.16830519  | -6.48980306 |
| O | 1.55592058  | 6.22714273  | -6.57614158 |
| O | 4.02168124  | 2.94710671  | -7.45182473 |
| O | 2.04025606  | 1.83084564  | -8.32379222 |
| O | 0.31109720  | 4.73267185  | -8.03101524 |
| O | -2.13834863 | 4.84518667  | -7.17474180 |
| O | -2.14803519 | 6.37921556  | -5.25844557 |
| O | -0.59614969 | -2.13485696 | -0.10777333 |
| O | 0.65215648  | -0.56757818 | 1.36816839  |

|    |             |             |              |
|----|-------------|-------------|--------------|
| O  | 3.01391036  | -2.33500216 | -1.43916591  |
| O  | 4.68533980  | -1.34987511 | -3.22703381  |
| O  | 5.65685560  | 0.78805049  | -2.22593795  |
| O  | 5.03953906  | 1.18800204  | -6.10830757  |
| H  | -3.66177924 | -1.45340223 | -1.61789654  |
| H  | -2.21219284 | -1.82566170 | 0.03774143   |
| H  | -2.55274166 | 1.53027994  | 1.53883781   |
| H  | -0.45450842 | 1.59089170  | 2.09649758   |
| H  | -4.06415243 | 2.34165514  | 0.23922212   |
| H  | -5.07976970 | 2.13588491  | -1.72221831  |
| H  | -5.21650966 | 2.73215305  | -3.89560929  |
| H  | 5.18515792  | 4.92414041  | -3.90099875  |
| H  | 2.54108131  | 6.23193667  | -6.77466484  |
| H  | 4.33323521  | 5.57231150  | -5.79723632  |
| H  | 0.75256800  | 5.62466878  | -7.90758977  |
| H  | -2.41039732 | 5.73836265  | -6.81515331  |
| H  | -2.95157285 | 6.49637466  | -4.67384529  |
| H  | -4.51785488 | 4.98364615  | -3.89053893  |
| H  | -0.20888583 | -1.98862449 | 0.79490307   |
| H  | 1.59390989  | -0.78092370 | 1.59085100   |
| H  | 3.65970505  | -0.07467322 | 0.88477678   |
| H  | 3.46224656  | -2.24506103 | -0.57416537  |
| H  | 5.46082739  | -1.08399046 | -2.69365191  |
| H  | 2.94394263  | 2.24394096  | -8.47450380  |
| H  | 5.81615556  | 1.54106485  | -5.59569416  |
| H  | 5.73358534  | 1.15718293  | -1.32763488  |
| H  | 6.27448300  | 1.95561611  | -3.39308666  |
| H  | 4.73788697  | 2.26301300  | -7.28032926  |
| Pu | -1.97934797 | 2.60369050  | -10.91066526 |
| O  | -4.51726405 | 2.62302615  | -11.02177191 |
| O  | -1.98024935 | 4.33954700  | -11.24531215 |
| O  | -1.95004323 | 0.86820749  | -10.57347670 |
| O  | -0.24089189 | 2.39545530  | -12.79343377 |
| O  | -3.07638993 | 2.99091768  | -8.72631034  |
| O  | -2.97755063 | 2.05576760  | -13.18168224 |
| H  | 0.35783102  | 1.62808824  | -12.76184464 |
| H  | 0.33695653  | 3.17752054  | -12.85627938 |
| H  | -3.16035720 | 2.24581442  | -8.10589288  |
| H  | -2.81073434 | 3.78775863  | -8.15848753  |
| H  | -4.82739753 | 2.96791979  | -10.16418606 |
| H  | -4.90340979 | 3.19287154  | -11.70987146 |
| H  | -3.38122627 | 1.17604464  | -13.28666340 |
| H  | -2.34099236 | 2.15556959  | -13.91220483 |
| O  | 0.11845020  | 2.88592198  | -9.82369997  |

|   |            |            |             |
|---|------------|------------|-------------|
| H | 0.21820913 | 3.73146178 | -9.28938246 |
| H | 0.77356298 | 2.28052223 | -9.37162393 |

$C_{60}(OH)_{24}/PuO_2(H_2O)_4^{2+}$  ( $C_{60}(OH)_{24}/Pu(VI)$ -IS1)

|   |             |             |             |
|---|-------------|-------------|-------------|
| C | -0.33892690 | 0.32006991  | -0.43552348 |
| C | 1.06552083  | 0.28125948  | -0.28615345 |
| C | 1.79573969  | 1.45893309  | -0.11203121 |
| C | 1.12298219  | 2.72781053  | -0.12590210 |
| C | -0.26446921 | 2.74985763  | -0.32592873 |
| C | -1.01328344 | 1.54114141  | -0.42283119 |
| C | -0.90677635 | -0.98947360 | -0.90383187 |
| C | 0.44582915  | -1.87015470 | -1.37499544 |
| C | 1.69507249  | -0.99220758 | -0.83862333 |
| C | 2.74083693  | -0.60390865 | -1.84648078 |
| C | 3.03302922  | 1.63603530  | -0.84979508 |
| C | 1.93768758  | 3.67982833  | -0.82944354 |
| C | 1.33947173  | 4.60254909  | -1.68902096 |
| C | -0.06397606 | 4.63652994  | -1.84429218 |
| C | -0.87530051 | 3.74492292  | -1.14618478 |
| C | -2.32070830 | 3.41279049  | -1.41902876 |
| C | -2.42020820 | 1.81024171  | -0.89816704 |
| C | -2.88252994 | 0.70986318  | -1.92979602 |
| C | -2.07141294 | -0.76486224 | -1.94942790 |
| C | 0.58352858  | -2.37285263 | -2.90639174 |
| C | -0.57972443 | -1.84405999 | -3.90828575 |
| C | -1.56700404 | -0.84128934 | -3.35733536 |
| C | -2.09372226 | 0.16491900  | -4.15064368 |
| C | -2.67470465 | 1.20299557  | -3.33654841 |
| C | -2.58764931 | 2.50982931  | -3.75588682 |
| C | -2.71293887 | 3.75151681  | -2.91412538 |
| C | -1.72044146 | 4.83692497  | -3.76033203 |
| C | -0.49685323 | 5.48707814  | -3.00120076 |
| C | 3.11944506  | 2.96780220  | -1.27845334 |
| C | 2.41437199  | 4.38006908  | -5.85601725 |
| C | 3.56308890  | 4.15411552  | -4.81044079 |
| C | 4.36825242  | 2.68619952  | -4.82857201 |
| C | 3.94380180  | 1.60301142  | -5.88316155 |
| C | 2.52442278  | 1.85500724  | -6.32780833 |
| C | 0.43970853  | 3.10935201  | -6.45602721 |
| C | -0.18911438 | 4.37952809  | -5.91223769 |
| C | 1.05807329  | 5.26278055  | -5.37251399 |
| C | 0.92452712  | 5.77265995  | -3.84572522 |
| C | 2.08955381  | 5.23999412  | -2.85210392 |
| C | 3.05101220  | 4.22643572  | -3.40568058 |

|   |             |             |             |
|---|-------------|-------------|-------------|
| C | 4.15773860  | 2.18844469  | -3.42995570 |
| C | 4.07533521  | 0.88857976  | -3.01049683 |
| C | 4.17822882  | -0.35414094 | -3.84497130 |
| C | 3.84495806  | -0.04860201 | -5.35105828 |
| C | 2.39106055  | -0.35524045 | -5.61812303 |
| C | 1.78056657  | 0.64615104  | -6.42684951 |
| C | 0.38892162  | 0.66622445  | -6.62533246 |
| C | -0.29146198 | 1.93436761  | -6.64011723 |
| C | -1.26539267 | 4.02036776  | -4.92741717 |
| C | -1.91755254 | 2.79938811  | -4.99620124 |
| C | -1.53090235 | 1.76079238  | -5.89985999 |
| C | -1.60751679 | 0.43035012  | -5.46824292 |
| C | -0.42430085 | -0.28350994 | -5.92483685 |
| C | 0.17363532  | -1.20190394 | -5.06564297 |
| C | 1.57749037  | -1.24835941 | -4.92367182 |
| C | 2.01217129  | -2.09596759 | -3.76543422 |
| C | 3.20972288  | -1.42918203 | -3.00503453 |
| C | 3.57415315  | 3.23424351  | -2.61028474 |
| C | 3.40776634  | 0.59354907  | -1.75657705 |
| C | 1.84549357  | 3.07277589  | -6.31698837 |
| O | 2.34990744  | -1.74307450 | 0.21127540  |
| O | 0.39884549  | -3.01343006 | -0.56766114 |
| O | 0.44628064  | -3.75906776 | -2.87815803 |
| O | -1.49292393 | -1.68752646 | 0.17218820  |
| O | -3.03728746 | -1.76316845 | -1.73357470 |
| O | -1.37412791 | -2.93220083 | -4.32196000 |
| O | -4.23188975 | 0.42649241  | -1.65661296 |
| O | -3.30864738 | 1.79498310  | 0.18973295  |
| O | 5.51063556  | -0.90798277 | -3.79850392 |
| O | 2.84451671  | 6.39392997  | -2.40867967 |
| O | 4.51907587  | 5.19513820  | -5.03887120 |
| O | 1.04061580  | 7.16840630  | -3.87050644 |
| O | -0.94948177 | 6.74223114  | -2.53190847 |
| O | 1.08136677  | 6.40878897  | -6.18530130 |
| O | -0.79710652 | 5.16442335  | -6.97818524 |
| O | -2.51332133 | 5.91675680  | -4.20759907 |
| O | -4.01845559 | 4.21562555  | -2.94346321 |
| O | -3.16907275 | 4.16469810  | -0.58917422 |
| O | 2.44593997  | -3.35406084 | -4.24054608 |
| O | 4.02547297  | -2.49917306 | -2.51950812 |
| O | 4.62409998  | -0.83363887 | -6.18883258 |
| O | 4.76144248  | 1.67176900  | -7.00364369 |
| O | 5.75712260  | 3.00246159  | -5.06685056 |
| O | 2.96671173  | 5.08504237  | -6.95605794 |

|    |             |             |              |
|----|-------------|-------------|--------------|
| H  | -1.00719683 | -3.69599933 | -3.79860161  |
| H  | 1.17173684  | -4.09276947 | -3.47955872  |
| H  | 1.19035715  | -2.93564438 | 0.03361966   |
| H  | 3.18336165  | -2.09621083 | -0.15867367  |
| H  | -0.90457759 | -2.49730283 | 0.26032615   |
| H  | -2.80500725 | -2.09099450 | -0.81457863  |
| H  | -4.27406123 | -0.57169371 | -1.65639511  |
| H  | 3.72225257  | 6.35253035  | -2.83575721  |
| H  | -0.27929452 | 7.38142032  | -2.91508797  |
| H  | 1.84157047  | 7.36287264  | -3.30566324  |
| H  | -2.26926435 | 6.64858338  | -3.56891198  |
| H  | -4.19182833 | 4.49721850  | -2.00890985  |
| H  | -3.51516745 | 3.50051890  | 0.07051059   |
| H  | -4.07593763 | 1.25116454  | -0.14628263  |
| H  | 3.24659935  | -3.55513452 | -3.68811216  |
| H  | 4.94546907  | -2.26120394 | -2.79948994  |
| H  | 6.08016205  | -0.32196982 | -3.26823747  |
| H  | 5.45526999  | -1.02696894 | -5.70939166  |
| H  | 5.64955148  | 1.94198845  | -6.69537161  |
| H  | -0.18776063 | 5.98294168  | -6.98570630  |
| H  | 3.83192985  | 5.42775034  | -6.59617444  |
| H  | 6.26772767  | 2.79690922  | -4.26278426  |
| H  | 5.39054825  | 4.72379557  | -5.08948483  |
| H  | 1.88839712  | 6.26453535  | -6.77078315  |
| Pu | -2.80045758 | 4.97703004  | -8.36404348  |
| O  | -3.75439860 | 4.09572474  | -10.53487496 |
| O  | -3.34487404 | 3.50789630  | -7.53670650  |
| O  | -2.24230231 | 6.43919556  | -9.19166248  |
| O  | -3.65472006 | 6.35637159  | -6.51075511  |
| O  | -1.06310347 | 3.57455828  | -9.60102369  |
| O  | -5.22138849 | 5.58141566  | -8.76495594  |
| H  | -3.49707619 | 7.31153750  | -6.60568213  |
| H  | -3.32207477 | 6.11955142  | -5.58621064  |
| H  | -0.25178127 | 4.00434415  | -9.92463661  |
| H  | -0.77077075 | 2.78133057  | -9.11257301  |
| H  | -3.16306393 | 3.63746708  | -11.15633090 |
| H  | -4.57338922 | 3.57278440  | -10.48709688 |
| H  | -5.44915062 | 6.29236193  | -9.38943248  |
| H  | -5.70661677 | 5.76788278  | -7.94083987  |

$C_{60}(OH)_{24}/PuO_2(H_2O)_3^{2+}$  ( $C_{60}(OH)_{24}/Pu(VI)$ -IS2)

|   |             |            |             |
|---|-------------|------------|-------------|
| C | -0.45287428 | 0.39034762 | -0.50398218 |
| C | 0.94576347  | 0.35862503 | -0.30183079 |
| C | 1.66540233  | 1.54194976 | -0.12812123 |

|   |             |             |             |
|---|-------------|-------------|-------------|
| C | 0.99125540  | 2.80851744  | -0.19402546 |
| C | -0.38802410 | 2.82351935  | -0.44354197 |
| C | -1.12857461 | 1.60896059  | -0.54250421 |
| C | -1.00021822 | -0.93244801 | -0.96015733 |
| C | 0.37061813  | -1.81957921 | -1.36234536 |
| C | 1.59780058  | -0.92583794 | -0.80137920 |
| C | 2.67798759  | -0.55759336 | -1.77977804 |
| C | 2.92870003  | 1.70557975  | -0.82553092 |
| C | 1.82951270  | 3.74668657  | -0.88871226 |
| C | 1.26272780  | 4.65532575  | -1.78294625 |
| C | -0.13745875 | 4.69130776  | -1.98075496 |
| C | -0.97103457 | 3.80536968  | -1.29939951 |
| C | -2.40254877 | 3.45345785  | -1.62538381 |
| C | -2.51694426 | 1.85999868  | -1.07383096 |
| C | -2.94286979 | 0.73245499  | -2.09284571 |
| C | -2.12819518 | -0.73944181 | -2.05034957 |
| C | 0.56447488  | -2.35731513 | -2.87584152 |
| C | -0.56457677 | -1.85765703 | -3.93024958 |
| C | -1.57568867 | -0.84699205 | -3.43876163 |
| C | -2.07662861 | 0.13613732  | -4.27505877 |
| C | -2.68750265 | 1.19211038  | -3.50190555 |
| C | -2.59054079 | 2.48661718  | -3.94934588 |
| C | -2.72562741 | 3.75549122  | -3.14393114 |
| C | -1.69454958 | 4.79044665  | -3.96766911 |
| C | -0.52732145 | 5.49507950  | -3.18674829 |
| C | 3.02827720  | 3.02621659  | -1.27994129 |
| C | 2.48471084  | 4.33074093  | -5.91492916 |
| C | 3.59113257  | 4.13037840  | -4.82022515 |
| C | 4.40140419  | 2.66869613  | -4.77747201 |
| C | 4.01610303  | 1.56223349  | -5.82286019 |
| C | 2.61297158  | 1.80055929  | -6.32589492 |
| C | 0.53028831  | 3.05051717  | -6.57903586 |
| C | -0.11525068 | 4.32828320  | -6.05764521 |
| C | 1.11494813  | 5.21988854  | -5.49698516 |
| C | 0.92562464  | 5.76262604  | -3.98651301 |
| C | 2.05206818  | 5.25916957  | -2.93939187 |
| C | 3.02841621  | 4.23167204  | -3.43634987 |
| C | 4.14402047  | 2.20091370  | -3.37575685 |
| C | 4.05081940  | 0.91113086  | -2.92958499 |
| C | 4.18432144  | -0.34919720 | -3.73278249 |
| C | 3.90118052  | -0.07702296 | -5.25583655 |
| C | 2.45798431  | -0.39175935 | -5.56570446 |
| C | 1.87584172  | 0.58807278  | -6.41895654 |
| C | 0.49193768  | 0.60085748  | -6.66599275 |

|   |             |             |             |
|---|-------------|-------------|-------------|
| C | -0.18766228 | 1.86360935  | -6.74048861 |
| C | -1.19108713 | 3.94557322  | -5.08476995 |
| C | -1.85993828 | 2.73642194  | -5.16402171 |
| C | -1.45344309 | 1.69419208  | -6.04630985 |
| C | -1.54228668 | 0.37209933  | -5.58041255 |
| C | -0.34149566 | -0.34217379 | -5.97637067 |
| C | 0.22695053  | -1.23891767 | -5.07525190 |
| C | 1.62407959  | -1.27412300 | -4.88053209 |
| C | 2.02084956  | -2.09438617 | -3.68970742 |
| C | 3.18885860  | -1.40744080 | -2.90264064 |
| C | 3.52890537  | 3.26242512  | -2.60093876 |
| C | 3.33905239  | 0.64296480  | -1.69399397 |
| C | 1.92996063  | 3.01572905  | -6.37479713 |
| O | 2.21496404  | -1.64993474 | 0.28875041  |
| O | 0.29601489  | -2.94328383 | -0.53007948 |
| O | 0.43111853  | -3.74284025 | -2.81920277 |
| O | -1.62041349 | -1.60560309 | 0.11251641  |
| O | -3.10011328 | -1.73247724 | -1.84054580 |
| O | -1.34571471 | -2.95712686 | -4.33792876 |
| O | -4.29975986 | 0.45159766  | -1.85531578 |
| O | -3.44764530 | 1.87359762  | -0.02073074 |
| O | 5.51450348  | -0.89957842 | -3.62761001 |
| O | 2.79660394  | 6.42318389  | -2.50494561 |
| O | 4.55065378  | 5.17359942  | -5.02423985 |
| O | 1.03428541  | 7.15880419  | -4.03395169 |
| O | -1.02957310 | 6.76757515  | -2.82247184 |
| O | 1.16457619  | 6.34562819  | -6.33247929 |
| O | -0.76502863 | 5.12257837  | -7.08009954 |
| O | -2.45391221 | 5.84287454  | -4.54826124 |
| O | -4.03781721 | 4.25780236  | -3.20079995 |
| O | -3.30484119 | 4.20999174  | -0.85292241 |
| O | 2.47392373  | -3.36181448 | -4.12007788 |
| O | 3.98946317  | -2.46216909 | -2.36247677 |
| O | 4.70673417  | -0.88147047 | -6.04871797 |
| O | 4.87510850  | 1.60514887  | -6.91215531 |
| O | 5.79653107  | 2.98603651  | -4.97277635 |
| O | 3.07926670  | 5.01399576  | -7.00475848 |
| H | -0.99180688 | -3.70761571 | -3.78665687 |
| H | 1.17763599  | -4.08693435 | -3.38881603 |
| H | 1.06774945  | -2.85235432 | 0.09456030  |
| H | 3.06426799  | -2.00588880 | -0.04050928 |
| H | -1.03233218 | -2.41134273 | 0.23892925  |
| H | -2.89608694 | -2.03918541 | -0.90744867 |
| H | -4.33668227 | -0.54773928 | -1.83092658 |

|    |             |             |             |
|----|-------------|-------------|-------------|
| H  | 3.68383322  | 6.37151090  | -2.91196053 |
| H  | -0.31853817 | 7.39167060  | -3.16330677 |
| H  | 1.82045178  | 7.37006220  | -3.45411113 |
| H  | -2.19163135 | 6.64314405  | -3.99298439 |
| H  | -4.22781787 | 4.49243343  | -2.24695530 |
| H  | -3.66520206 | 3.54799214  | -0.19320274 |
| H  | -4.19576508 | 1.30854738  | -0.36853412 |
| H  | 3.25534265  | -3.54846828 | -3.53636814 |
| H  | 4.91796271  | -2.22797635 | -2.61743634 |
| H  | 6.06626911  | -0.29977004 | -3.09410398 |
| H  | 5.52624622  | -1.05629053 | -5.54336060 |
| H  | 5.75028005  | 1.88916079  | -6.58082779 |
| H  | -0.12655390 | 5.90914545  | -7.14390116 |
| H  | 3.92354845  | 5.37614131  | -6.61895077 |
| H  | 6.28114264  | 2.79461039  | -4.14951492 |
| H  | 5.42525240  | 4.70530427  | -5.03872251 |
| H  | 1.98275599  | 6.18296045  | -6.89775282 |
| Pu | -3.24115387 | 5.72563645  | -6.94950249 |
| O  | -5.40256001 | 6.24033808  | -8.10922010 |
| O  | -3.61501809 | 4.00364112  | -7.11488376 |
| O  | -2.92802253 | 7.46602415  | -6.86842856 |
| O  | -2.64847857 | 5.84392520  | -9.37243988 |
| O  | -5.10505887 | 5.68071026  | -5.26798151 |
| H  | -2.54154583 | 6.65152294  | -9.90299193 |
| H  | -2.71629181 | 5.09811864  | -9.99288178 |
| H  | -5.78697511 | 7.13019208  | -8.18749222 |
| H  | -6.14494656 | 5.62028650  | -7.99936290 |
| H  | -5.36382517 | 6.52798383  | -4.86741608 |
| H  | -4.77987871 | 5.12283824  | -4.50326644 |



**Table S2.** Calculated formation energies ( $\Delta E$ ) in the gas phase and solvent of studied complexes at PBE-D3BJ level of theory

| complexes                                                               | $\Delta E_{\text{gas}}$<br>(Kcal/mol) | $\Delta E_{\text{sol}}$<br>(Kcal/mol) |
|-------------------------------------------------------------------------|---------------------------------------|---------------------------------------|
| $\text{C}_{60}(\text{OH})_{24}/\text{UO}_2(\text{H}_2\text{O})_5^{2+}$  | -101.80                               | -34.98                                |
| $\text{C}_{60}(\text{OH})_{24}/\text{UO}_2(\text{H}_2\text{O})_4^{2+}$  | -79.50                                | -19.25                                |
| $\text{C}_{60}(\text{OH})_{24}/\text{UO}_2(\text{H}_2\text{O})_3^{2+}$  | -70.36                                | -2.12                                 |
| $\text{C}_{60}(\text{OH})_{24}/\text{NpO}_2(\text{H}_2\text{O})_5^{1+}$ | -47.98                                | -29.37                                |
| $\text{C}_{60}(\text{OH})_{24}/\text{NpO}_2(\text{H}_2\text{O})_4^{1+}$ | -28.40                                | -10.49                                |
| $\text{C}_{60}(\text{OH})_{24}/\text{NpO}_2(\text{H}_2\text{O})_3^{1+}$ | -16.88                                | 0.85                                  |
| $\text{C}_{60}(\text{OH})_{24}/\text{NpO}_2(\text{H}_2\text{O})_5^{2+}$ | -106.53                               | -34.68                                |
| $\text{C}_{60}(\text{OH})_{24}/\text{NpO}_2(\text{H}_2\text{O})_4^{2+}$ | -84.03                                | -15.64                                |
| $\text{C}_{60}(\text{OH})_{24}/\text{NpO}_2(\text{H}_2\text{O})_3^{2+}$ | -77.29                                | -3.92                                 |
| $\text{C}_{60}(\text{OH})_{24}/\text{PuO}_2(\text{H}_2\text{O})_5^{1+}$ | -48.29                                | -29.78                                |
| $\text{C}_{60}(\text{OH})_{24}/\text{PuO}_2(\text{H}_2\text{O})_4^{1+}$ | -29.19                                | -11.04                                |
| $\text{C}_{60}(\text{OH})_{24}/\text{PuO}_2(\text{H}_2\text{O})_3^{1+}$ | -17.12                                | -0.08                                 |
| $\text{C}_{60}(\text{OH})_{24}/\text{PuO}_2(\text{H}_2\text{O})_5^{2+}$ | -113.08                               | -39.60                                |
| $\text{C}_{60}(\text{OH})_{24}/\text{PuO}_2(\text{H}_2\text{O})_4^{2+}$ | -91.89                                | -19.25                                |
| $\text{C}_{60}(\text{OH})_{24}/\text{PuO}_2(\text{H}_2\text{O})_3^{2+}$ | -80.03                                | -9.06                                 |

**Table S3.** Calculated formation energies ( $\Delta E$ ) in the gas phase and solvent of studied complexes at wB97X-D3BJ level of theory.

| complexes                                                               | $\Delta E_{\text{gas}}$<br>(Kcal/mol) | $\Delta E_{\text{sol}}$<br>(Kcal/mol) |
|-------------------------------------------------------------------------|---------------------------------------|---------------------------------------|
| $\text{C}_{60}(\text{OH})_{24}/\text{UO}_2(\text{H}_2\text{O})_5^{2+}$  | -111.63                               | -46.28                                |
| $\text{C}_{60}(\text{OH})_{24}/\text{UO}_2(\text{H}_2\text{O})_4^{2+}$  | -91.73                                | -29.92                                |
| $\text{C}_{60}(\text{OH})_{24}/\text{UO}_2(\text{H}_2\text{O})_3^{2+}$  | -85.47                                | -19.00                                |
| $\text{C}_{60}(\text{OH})_{24}/\text{NpO}_2(\text{H}_2\text{O})_5^{1+}$ | -61.24                                | -43.89                                |
| $\text{C}_{60}(\text{OH})_{24}/\text{NpO}_2(\text{H}_2\text{O})_4^{1+}$ | -49.54                                | -31.83                                |
| $\text{C}_{60}(\text{OH})_{24}/\text{NpO}_2(\text{H}_2\text{O})_3^{1+}$ | -39.84                                | -22.45                                |
| $\text{C}_{60}(\text{OH})_{24}/\text{NpO}_2(\text{H}_2\text{O})_5^{2+}$ | -112.96                               | -46.93                                |
| $\text{C}_{60}(\text{OH})_{24}/\text{NpO}_2(\text{H}_2\text{O})_4^{2+}$ | -93.72                                | -31.27                                |
| $\text{C}_{60}(\text{OH})_{24}/\text{NpO}_2(\text{H}_2\text{O})_3^{2+}$ | -69.53                                | 2.69                                  |
| $\text{C}_{60}(\text{OH})_{24}/\text{PuO}_2(\text{H}_2\text{O})_5^{1+}$ | -66.46                                | -47.40                                |
| $\text{C}_{60}(\text{OH})_{24}/\text{PuO}_2(\text{H}_2\text{O})_4^{1+}$ | -54.93                                | -36.29                                |
| $\text{C}_{60}(\text{OH})_{24}/\text{PuO}_2(\text{H}_2\text{O})_3^{1+}$ | -31.89                                | -13.91                                |
| $\text{C}_{60}(\text{OH})_{24}/\text{PuO}_2(\text{H}_2\text{O})_5^{2+}$ | -105.65                               | -34.03                                |
| $\text{C}_{60}(\text{OH})_{24}/\text{PuO}_2(\text{H}_2\text{O})_4^{2+}$ | -99.92                                | -28.22                                |
| $\text{C}_{60}(\text{OH})_{24}/\text{PuO}_2(\text{H}_2\text{O})_3^{2+}$ | -102.03                               | -33.92                                |

**Table S4.** Topological parameters relevant to the typical chemical bonds in actinyl/  
C<sub>60</sub>(OH)<sub>24</sub> complexes.

| Species                                                                                            | BCP                                                                                                | $\rho(r)$ | $\nabla^2\rho$ | $H(r)$   |          |
|----------------------------------------------------------------------------------------------------|----------------------------------------------------------------------------------------------------|-----------|----------------|----------|----------|
| C <sub>60</sub> (OH) <sub>24</sub> /UO <sub>2</sub> (H <sub>2</sub> O) <sub>5</sub> <sup>2+</sup>  | An=O                                                                                               | 0.303     | 0.216          | -0.288   |          |
|                                                                                                    |                                                                                                    | 0.301     | 0.220          | -0.284   |          |
|                                                                                                    | An-OH <sub>2</sub>                                                                                 | 0.043     | 0.172          | 0.15E-2  |          |
|                                                                                                    |                                                                                                    | 0.064     | 0.259          | -0.15E-2 |          |
|                                                                                                    |                                                                                                    | 0.045     | 0.176          | 0.12E-2  |          |
|                                                                                                    |                                                                                                    | 0.078     | 0.308          | -0.61E-2 |          |
|                                                                                                    |                                                                                                    | 0.043     | 0.165          | 0.12E-2  |          |
|                                                                                                    |                                                                                                    | H---OH    | 0.067          | 0.169    | -0.13E-1 |
|                                                                                                    | 0.072                                                                                              |           | 0.183          | -0.17E-1 |          |
|                                                                                                    | C <sub>60</sub> (OH) <sub>24</sub> /UO <sub>2</sub> (H <sub>2</sub> O) <sub>4</sub> <sup>2+</sup>  | An=O      | 0.302          | 0.208    | -0.288   |
| 0.299                                                                                              |                                                                                                    |           | 0.214          | -0.281   |          |
| An-OH <sub>2</sub>                                                                                 |                                                                                                    | 0.047     | 0.185          | 0.99E-3  |          |
|                                                                                                    |                                                                                                    | 0.065     | 0.250          | -0.21E-2 |          |
|                                                                                                    |                                                                                                    | 0.046     | 0.195          | 0.20E-2  |          |
|                                                                                                    |                                                                                                    | 0.046     | 0.187          | 0.16E-2  |          |
| An-OH                                                                                              |                                                                                                    | 0.067     | 0.277          | -0.21E-2 |          |
| H---OH                                                                                             |                                                                                                    | 0.079     | 0.155          | -0.26E-1 |          |
| C <sub>60</sub> (OH) <sub>24</sub> /UO <sub>2</sub> (H <sub>2</sub> O) <sub>3</sub> <sup>2+</sup>  |                                                                                                    | An=O      | 0.301          | 0.212    | -0.286   |
|                                                                                                    |                                                                                                    |           | 0.299          | 0.223    | -0.281   |
|                                                                                                    | An-OH <sub>2</sub>                                                                                 | 0.054     | 0.199          | -0.53E-3 |          |
|                                                                                                    |                                                                                                    | 0.048     | 0.204          | 0.20E-2  |          |
|                                                                                                    |                                                                                                    | 0.047     | 0.197          | 0.20E-2  |          |
|                                                                                                    | An-OH                                                                                              | 0.055     | 0.216          | -0.21E-3 |          |
|                                                                                                    |                                                                                                    | 0.055     | 0.204          | -0.86E-3 |          |
|                                                                                                    | H---OH                                                                                             | 0.049     | 0.167          | -0.96E-3 |          |
|                                                                                                    | C <sub>60</sub> (OH) <sub>24</sub> /NpO <sub>2</sub> (H <sub>2</sub> O) <sub>5</sub> <sup>1+</sup> | An=O      | 0.285          | 0.208    | -0.254   |
|                                                                                                    |                                                                                                    |           | 0.286          | 0.203    | -0.257   |
| An-OH <sub>2</sub>                                                                                 |                                                                                                    | 0.043     | 0.192          | 0.20E-2  |          |
|                                                                                                    |                                                                                                    | 0.040     | 0.165          | 0.14E-2  |          |
|                                                                                                    |                                                                                                    | 0.042     | 0.187          | 0.25E-3  |          |
|                                                                                                    |                                                                                                    | 0.038     | 0.156          | 0.13E-2  |          |
|                                                                                                    |                                                                                                    | 0.049     | 0.218          | 0.16E-2  |          |
| H---OH                                                                                             |                                                                                                    | 0.050     | 0.171          | -0.76E-3 |          |
|                                                                                                    |                                                                                                    | 0.056     | 0.187          | -0.41E-2 |          |
|                                                                                                    |                                                                                                    | 0.051     | 0.185          | -0.86E-3 |          |
| C <sub>60</sub> (OH) <sub>24</sub> /NpO <sub>2</sub> (H <sub>2</sub> O) <sub>4</sub> <sup>1+</sup> | An=O                                                                                               | 0.284     | 0.206          | -0.254   |          |
|                                                                                                    |                                                                                                    | 0.283     | 0.204          | -0.251   |          |
|                                                                                                    | An-OH <sub>2</sub>                                                                                 | 0.037     | 0.155          | 0.18E-2  |          |

|                                      |                    |       |       |          |
|--------------------------------------|--------------------|-------|-------|----------|
|                                      |                    | 0.041 | 0.169 | 0.16E-2  |
|                                      |                    | 0.041 | 0.179 | 0.22E-2  |
|                                      |                    | 0.049 | 0.214 | 0.13E-2  |
|                                      | An-OH              | 0.049 | 0.230 | 0.25E-2  |
|                                      | H---OH             | 0.055 | 0.185 | -0.34E-2 |
| $C_{60}(OH)_{24}/NpO_2(H_2O)_3^{1+}$ | An=O               | 0.286 | 0.208 | -0.256   |
|                                      |                    | 0.285 | 0.208 | -0.254   |
|                                      | An-OH <sub>2</sub> | 0.046 | 0.196 | 0.14E-2  |
|                                      |                    | 0.043 | 0.200 | 0.30E-2  |
|                                      |                    | 0.040 | 0.179 | 0.25E-2  |
|                                      | An-OH              | 0.045 | 0.202 | 0.24E-2  |
|                                      |                    | 0.037 | 0.156 | 0.17E-2  |
|                                      | H---OH             | 0.039 | 0.148 | 0.29E-2  |
| $C_{60}(OH)_{24}/NpO_2(H_2O)_5^{2+}$ | An=O               | 0.310 | 0.189 | -0.300   |
|                                      |                    | 0.310 | 0.189 | -0.298   |
|                                      | An-OH <sub>2</sub> | 0.057 | 0.227 | -0.14E-3 |
|                                      |                    | 0.046 | 0.174 | 0.11E-2  |
|                                      |                    | 0.044 | 0.179 | 0.17E-2  |
|                                      |                    | 0.072 | 0.288 | -0.34E-2 |
|                                      |                    | 0.044 | 0.177 | 0.15E-3  |
|                                      | H---OH             | 0.054 | 0.163 | -0.38E-2 |
|                                      |                    | 0.063 | 0.175 | -0.11E-1 |
|                                      |                    | 0.064 | 0.185 | -0.98E-2 |
| $C_{60}(OH)_{24}/NpO_2(H_2O)_4^{2+}$ | An=O               | 0.311 | 0.178 | -0.300   |
|                                      |                    | 0.308 | 0.187 | -0.296   |
|                                      | An-OH <sub>2</sub> | 0.045 | 0.180 | 0.12E-2  |
|                                      |                    | 0.045 | 0.187 | 0.20E-2  |
|                                      |                    | 0.046 | 0.189 | 0.21E-2  |
|                                      |                    | 0.061 | 0.239 | -0.10E-2 |
|                                      | An-OH              | 0.061 | 0.259 | -0.44E-3 |
|                                      | H---OH             | 0.067 | 0.171 | -0.14E-1 |
| $C_{60}(OH)_{24}/NpO_2(H_2O)_3^{2+}$ | An=O               | 0.304 | 0.184 | -0.289   |
|                                      |                    | 0.304 | 0.182 | -0.289   |
|                                      | An-OH <sub>2</sub> | 0.051 | 0.195 | 0.55E-3  |
|                                      |                    | 0.046 | 0.201 | 0.24E-2  |
|                                      |                    | 0.046 | 0.207 | 0.26E-2  |
|                                      | An-OH              | 0.049 | 0.210 | 0.13E-2  |
|                                      |                    | 0.044 | 0.174 | 0.89E-3  |
|                                      | H---OH             | 0.041 | 0.149 | 0.19E-2  |
| $C_{60}(OH)_{24}/PuO_2(H_2O)_5^{1+}$ | An=O               | 0.290 | 0.189 | -0.261   |
|                                      |                    | 0.293 | 0.182 | -0.267   |
|                                      | An-OH <sub>2</sub> | 0.041 | 0.181 | 0.18E-2  |
|                                      |                    | 0.038 | 0.160 | 0.16E-2  |
|                                      |                    | 0.041 | 0.177 | 0.16E-2  |

|                                      |                    |       |       |          |
|--------------------------------------|--------------------|-------|-------|----------|
|                                      |                    | 0.035 | 0.145 | 0.13E-2  |
|                                      |                    | 0.045 | 0.203 | 0.17E-2  |
|                                      | H---OH             | 0.050 | 0.171 | -0.74E-3 |
|                                      |                    | 0.052 | 0.178 | -0.20E-2 |
|                                      |                    | 0.046 | 0.171 | 0.11E-2  |
| $C_{60}(OH)_{24}/PuO_2(H_2O)_4^{1+}$ | An=O               | 0.290 | 0.189 | -0.261   |
|                                      |                    | 0.288 | 0.189 | -0.257   |
|                                      | An-OH <sub>2</sub> | 0.036 | 0.157 | 0.19E-2  |
|                                      |                    | 0.040 | 0.173 | 0.17E-2  |
|                                      |                    | 0.040 | 0.172 | 0.19E-2  |
|                                      |                    | 0.045 | 0.195 | 0.15E-2  |
|                                      | An-OH              | 0.048 | 0.229 | 0.28E-2  |
|                                      | H---OH             | 0.051 | 0.177 | -0.11E-2 |
| $C_{60}(OH)_{24}/PuO_2(H_2O)_3^{1+}$ | An=O               | 0.293 | 0.186 | -0.266   |
|                                      |                    | 0.288 | 0.197 | -0.257   |
|                                      | An-OH <sub>2</sub> | 0.043 | 0.207 | 0.33E-2  |
|                                      |                    | 0.040 | 0.172 | 0.18E-2  |
|                                      |                    | 0.036 | 0.153 | 0.13E-2  |
|                                      | An-OH              | 0.039 | 0.167 | 0.19E-2  |
|                                      |                    | 0.040 | 0.188 | 0.25E-2  |
|                                      | H---OH             | 0.039 | 0.144 | 0.25E-2  |
| $C_{60}(OH)_{24}/PuO_2(H_2O)_5^{2+}$ | An=O               | 0.309 | 0.180 | -0.294   |
|                                      |                    | 0.309 | 0.181 | -0.295   |
|                                      | An-OH <sub>2</sub> | 0.062 | 0.275 | -0.17E-4 |
|                                      |                    | 0.039 | 0.166 | 0.19E-2  |
|                                      |                    | 0.043 | 0.178 | 0.17E-2  |
|                                      |                    | 0.043 | 0.177 | 0.14E-2  |
|                                      |                    | 0.050 | 0.213 | 0.14E-2  |
|                                      | H---OH             | 0.044 | 0.150 | 0.70E-3  |
|                                      |                    | 0.056 | 0.178 | -0.46E-2 |
|                                      |                    | 0.054 | 0.183 | -0.26E-2 |
| $C_{60}(OH)_{24}/PuO_2(H_2O)_4^{2+}$ | An=O               | 0.300 | 0.178 | -0.280   |
|                                      |                    | 0.303 | 0.159 | -0.285   |
|                                      | An-OH <sub>2</sub> | 0.040 | 0.181 | 0.26E-2  |
|                                      |                    | 0.041 | 0.191 | 0.26E-2  |
|                                      |                    | 0.042 | 0.191 | 0.25E-2  |
|                                      |                    | 0.050 | 0.228 | 0.18E-2  |
|                                      | An-OH              | 0.051 | 0.249 | 0.31E-2  |
|                                      | H---OH             | 0.052 | 0.186 | -0.15E-2 |
| $C_{60}(OH)_{24}/PuO_2(H_2O)_3^{2+}$ | An=O               | 0.302 | 0.176 | -0.284   |
|                                      |                    | 0.303 | 0.168 | -0.285   |
|                                      | An-OH <sub>2</sub> | 0.045 | 0.214 | 0.34E-2  |
|                                      |                    | 0.044 | 0.204 | 0.30E-2  |
|                                      |                    | 0.045 | 0.198 | 0.18E-2  |

|        |       |       |         |
|--------|-------|-------|---------|
| An-OH  | 0.041 | 0.182 | 0.23E-2 |
|        | 0.041 | 0.196 | 0.28E-2 |
| H---OH | 0.039 | 0.148 | 0.31E-2 |

**Table S5.** The intrinsic bond strength indexes of typical chemical bonds in studied complexes.

| Species                                        | An-O <sub>F</sub> |      | H <sub>w</sub> ---OH <sub>F</sub> |      |      | An-O <sub>yl</sub> | An-O <sub>w</sub> |
|------------------------------------------------|-------------------|------|-----------------------------------|------|------|--------------------|-------------------|
| C <sub>60</sub> (OH) <sub>24</sub> /U(VI)-OS   | -                 |      | 0.08                              | 0.09 | 0.08 | 0.38               | 0.03-0.09         |
| C <sub>60</sub> (OH) <sub>24</sub> /U(VI)-IS1  | 0.06              |      | 0.09                              | -    | -    | 0.36               | 0.04-0.05         |
| C <sub>60</sub> (OH) <sub>24</sub> /U(VI)-IS2  | 0.05              | 0.05 | 0.06                              |      |      | 0.36               | 0.04-0.05         |
| C <sub>60</sub> (OH) <sub>24</sub> /Np(V)-OS   | -                 |      | 0.06                              | 0.06 | 0.07 | 0.33               | 0.03-0.04         |
| C <sub>60</sub> (OH) <sub>24</sub> /Np(V)-IS1  | 0.04              |      | 0.06                              | -    | -    | 0.34               | 0.04-0.05         |
| C <sub>60</sub> (OH) <sub>24</sub> /Np(V)-IS2  | 0.04              | 0.04 | 0.05                              | -    | -    | 0.34               | 0.04-0.05         |
| C <sub>60</sub> (OH) <sub>24</sub> /Np(VI)-OS  |                   |      | 0.06                              | 0.08 | 0.08 | 0.36               | 0.03-0.08         |
| C <sub>60</sub> (OH) <sub>24</sub> /Np(VI)-IS1 | 0.05              |      | 0.08                              |      |      | 0.37               | 0.03-0.06         |
| C <sub>60</sub> (OH) <sub>24</sub> /Np(VI)-IS2 | 0.04              | 0.05 | 0.05                              |      |      | 0.37               | 0.04-0.05         |
| C <sub>60</sub> (OH) <sub>24</sub> /Pu(V)-OS   | -                 |      | 0.06                              | 0.05 | 0.07 | 0.35               | 0.04-0.04         |
| C <sub>60</sub> (OH) <sub>24</sub> /Pu(V)-IS1  | 0.04              |      | 0.06                              | -    | -    | 0.35               | 0.03-0.04         |
| C <sub>60</sub> (OH) <sub>24</sub> /Pu(V)-IS2  | 0.04              | 0.04 | 0.05                              | -    | -    | 0.34               | 0.04-0.04         |
| C <sub>60</sub> (OH) <sub>24</sub> /Pu(VI)-OS  | -                 |      | 0.05                              | 0.07 | 0.07 | 0.36               | 0.04-0.05         |
| C <sub>60</sub> (OH) <sub>24</sub> /Pu(VI)-IS1 | 0.04              |      | 0.06                              | -    | -    | 0.37               | 0.04-0.05         |
| C <sub>60</sub> (OH) <sub>24</sub> /Pu(VI)-IS2 | 0.04              | 0.04 | 0.05                              | -    | -    | 0.37               | 0.04-0.05         |

**Table S6.** Symmetrical ( $w_{\text{sym}}$ ) and asymmetrical ( $w_{\text{an-sym}}$ ) harmonic vibrational frequencies as well as intensities (km/mol) of O=An=O for studied complexes, the frequency changes ( $\Delta w$ ) after the adsorption on C<sub>60</sub>(OH)<sub>24</sub> fulleranol relative to free one.

| Species                                                                                            | $w_{\text{sym}}$ (cm <sup>-1</sup> ) | $\Delta w_{\text{sym}}$ (cm <sup>-1</sup> ) | $w_{\text{an-sym}}$ (cm <sup>-1</sup> ) | $\Delta w_{\text{an-sym}}$ (cm <sup>-1</sup> ) |
|----------------------------------------------------------------------------------------------------|--------------------------------------|---------------------------------------------|-----------------------------------------|------------------------------------------------|
| UO <sub>2</sub> (H <sub>2</sub> O) <sub>5</sub> <sup>2+</sup>                                      | 882 (0.29)                           | -                                           | 977 (267.79)                            | -                                              |
| C <sub>60</sub> (OH) <sub>24</sub> /UO <sub>2</sub> (H <sub>2</sub> O) <sub>5</sub> <sup>2+</sup>  | 845 (236.10)                         | -37                                         | 945 (174.54)                            | -32                                            |
| C <sub>60</sub> (OH) <sub>24</sub> /UO <sub>2</sub> (H <sub>2</sub> O) <sub>4</sub> <sup>2+</sup>  | 839 (238.74)                         | -43                                         | 941 (126.15)                            | -36                                            |
| C <sub>60</sub> (OH) <sub>24</sub> /UO <sub>2</sub> (H <sub>2</sub> O) <sub>3</sub> <sup>2+</sup>  | 836 (188.38)                         | -46                                         | 932 (104.99)                            | -45                                            |
| NpO <sub>2</sub> (H <sub>2</sub> O) <sub>5</sub> <sup>1+</sup>                                     | 862 (0.15)                           | -                                           | 954 (245.13)                            | -                                              |
| C <sub>60</sub> (OH) <sub>24</sub> /NpO <sub>2</sub> (H <sub>2</sub> O) <sub>5</sub> <sup>1+</sup> | 827 (120.43)                         | -35                                         | 949 (63.12)                             | -5                                             |
| C <sub>60</sub> (OH) <sub>24</sub> /NpO <sub>2</sub> (H <sub>2</sub> O) <sub>4</sub> <sup>1+</sup> | 834 (189.88)                         | -28                                         | 934 (56.68)                             | -20                                            |
| C <sub>60</sub> (OH) <sub>24</sub> /NpO <sub>2</sub> (H <sub>2</sub> O) <sub>3</sub> <sup>1+</sup> | 779 (372.62)                         | -83                                         | 889 (185.51)                            | -65                                            |
| NpO <sub>2</sub> (H <sub>2</sub> O) <sub>5</sub> <sup>2+</sup>                                     | 882 (0.48)                           | -                                           | 987 (234.93)                            | -                                              |
| C <sub>60</sub> (OH) <sub>24</sub> /NpO <sub>2</sub> (H <sub>2</sub> O) <sub>5</sub> <sup>2+</sup> | 824 (479.90)                         | -58                                         | 942 (192.03)                            | -45                                            |
| C <sub>60</sub> (OH) <sub>24</sub> /NpO <sub>2</sub> (H <sub>2</sub> O) <sub>4</sub> <sup>2+</sup> | 819 (122.13)                         | -63                                         | 940 (94.59)                             | -47                                            |
| C <sub>60</sub> (OH) <sub>24</sub> /NpO <sub>2</sub> (H <sub>2</sub> O) <sub>3</sub> <sup>2+</sup> | 803 (242.47)                         | -79                                         | 925 (83.06)                             | -62                                            |
| PuO <sub>2</sub> (H <sub>2</sub> O) <sub>5</sub> <sup>1+</sup>                                     | 853 (0.42)                           | -                                           | 950 (228.06)                            | -                                              |
| C <sub>60</sub> (OH) <sub>24</sub> /PuO <sub>2</sub> (H <sub>2</sub> O) <sub>5</sub> <sup>1+</sup> | 789 (223.90)                         | -64                                         | 927 (138.12)                            | -23                                            |
| C <sub>60</sub> (OH) <sub>24</sub> /PuO <sub>2</sub> (H <sub>2</sub> O) <sub>4</sub> <sup>1+</sup> | 811 (153.78)                         | -42                                         | 914 (189.58)                            | -36                                            |
| C <sub>60</sub> (OH) <sub>24</sub> /PuO <sub>2</sub> (H <sub>2</sub> O) <sub>3</sub> <sup>1+</sup> | 766 (523.52)                         | -87                                         | 877 (55.87)                             | -73                                            |
| PuO <sub>2</sub> (H <sub>2</sub> O) <sub>5</sub> <sup>2+</sup>                                     | 873 (0.00)                           | -                                           | 1019 (189.71)                           | -                                              |
| C <sub>60</sub> (OH) <sub>24</sub> /PuO <sub>2</sub> (H <sub>2</sub> O) <sub>5</sub> <sup>2+</sup> | 804 (177.39)                         | -69                                         | 946 (201.52)                            | -73                                            |
| C <sub>60</sub> (OH) <sub>24</sub> /PuO <sub>2</sub> (H <sub>2</sub> O) <sub>4</sub> <sup>2+</sup> | 816 (188.62)                         | -57                                         | 942 (150.97)                            | -77                                            |
| C <sub>60</sub> (OH) <sub>24</sub> /PuO <sub>2</sub> (H <sub>2</sub> O) <sub>3</sub> <sup>2+</sup> | 786 (352.77)                         | -87                                         | 916 (96.68)                             | -103                                           |
